# Supplementary material for: Selection of Polymorphic Patterns Obtained by RAPD-PCR through Qualitative and Quantitative Analyses to Differentiate Aspergillus fumigatus
Source: MDPI journal article supplement (doi:10.3390/jof8030296), 2022-03-13
Supplement: s1 [file s1]

# Figures S3 (1-15). Probability equation of the selected primers

## OPC-06

$$\text{If} \left( \begin{array}{l} \text{MARCADOR} == \text{"OPC-06"} \Rightarrow -21.00226769 + 3.0382244686 \cdot \text{NUMERO DE BANDAS} + -0.47340996 \cdot \text{INTESIDAD} + -0.001355211 \cdot \text{pb} \\ \text{else} \Rightarrow. \end{array} \right)$$

**Figure 1.** Linear equation for [*Flavus*] by primer OPC-06.

$$\text{If} \left( \begin{array}{l} \text{MARCADOR} == \text{"OPC-06"} \Rightarrow -4.304772735 + 0.5548339918 \cdot \text{NUMERO DE BANDAS} + 0.2661089972 \cdot \text{INTESIDAD} + -0.0011350645 \cdot \text{pb} \\ \text{else} \Rightarrow. \end{array} \right)$$

**Figure 2.** Linear equation for [*Fumigatus*] by primer OPC-06.

$$\text{If} \left( \begin{array}{l} \text{MARCADOR} == \text{"OPC-06"} \Rightarrow -6.165119829 + 1.1376187607 \cdot \text{NUMERO DE BANDAS} + -0.402930447 \cdot \text{INTESIDAD} + -0.000413115 \cdot \text{pb} \\ \text{else} \Rightarrow. \end{array} \right)$$

**Figure 3.** Linear equation for [*Niger*] by primer OPC-06.

$$\text{If} \left( \begin{array}{l} \text{MARCADOR} == \text{"OPC-06"} \Rightarrow \frac{1}{\begin{array}{l} + \text{Exp}(-\text{Lineal}[\text{FLAVUS}] \text{PorMARCADOR}) \\ + \text{Exp}(\text{Lineal}[\text{FUMIGATUS}] \text{PorMARCADOR} - \text{Lineal}[\text{FLAVUS}] \text{PorMARCADOR}) \\ + \text{Exp}(\text{Lineal}[\text{NIGER}] \text{PorMARCADOR} - \text{Lineal}[\text{FLAVUS}] \text{PorMARCADOR}) \end{array}} \\ \text{else} \Rightarrow. \end{array} \right)$$

**Figure 4.** Probability (correspondence) that the isolates correspond to [*Flavus*] by primer OPC-06.

$$\text{If} \left( \begin{array}{l} \text{MARCADOR} == \text{"OPC-06"} \Rightarrow \text{ifMax} \left( \begin{array}{ll} \text{Prob}[\text{FLAVUS}] \text{PorMARCADOR} & \Rightarrow \text{"FLAVUS"} \\ \text{Prob}[\text{FUMIGATUS}] \text{PorMARCADOR} & \Rightarrow \text{"FUMIGATUS"} \\ \text{Prob}[\text{NIGER}] \text{PorMARCADOR} & \Rightarrow \text{"NIGER"} \\ \text{Prob}[\text{TUBINGENSIS}] \text{PorMARCADOR} & \Rightarrow \text{"TUBINGENSIS"} \\ \text{else} & \Rightarrow \text{""} \end{array} \right) \\ \text{else} \Rightarrow. \end{array} \right)$$

**Figure 5.** Equation to determine the most probable species by marker OPC-06.

## OPF-01

$$\text{If} \left( \begin{array}{l} \text{MARCADOR} == \text{"OPF-01"} \Rightarrow 0.8818445222 + -0.01147971 \cdot \text{NUMERO DE BANDAS} + -0.507586078 \cdot \text{INTESIDAD} + -0.000368841 \cdot \text{pb} \\ \text{else} \Rightarrow. \end{array} \right)$$

**Figure 6.** Linear equation for [*Flavus*] by primer OPF-01.

$$\text{If} \left( \text{MARCADOR} == \text{"OPF-01"} \Rightarrow -383.3638226 + 44.898815291 \cdot \text{NUMERO DE BANDAS} + 3.5088227063 \cdot \text{INTESIDAD} + 0.0003966942 \cdot \text{pb} \right) \\ \text{else} \Rightarrow .$$

**Figure 7.** Linear equation for [*Fumigatus*] by primer OPF-01

$$\text{If} \left( \text{MARCADOR} == \text{"OPF-01"} \Rightarrow 1.5081763687 + -0.344162387 \cdot \text{NUMERO DE BANDAS} + -0.134566159 \cdot \text{INTESIDAD} + 0.0005784623 \cdot \text{pb} \right) \\ \text{else} \Rightarrow .$$

**Figure 8.** Linear equation for [*Niger*] by primer OPF-01.

$$\text{If} \left( \text{MARCADOR} == \text{"OPF-01"} \Rightarrow \frac{1}{\frac{1}{\begin{aligned} &+ \text{Exp}(\text{Lineal}[\text{FLAVUS}] \text{PorMARCADOR} - \text{Lineal}[\text{FUMIGATUS}] \text{PorMARCADOR}) \\ &+ \text{Exp}(-\text{Lineal}[\text{FUMIGATUS}] \text{PorMARCADOR}) \\ &+ \text{Exp}(\text{Lineal}[\text{NIGER}] \text{PorMARCADOR} - \text{Lineal}[\text{FUMIGATUS}] \text{PorMARCADOR}) \end{aligned}}} \right) \\ \text{else} \Rightarrow .$$

**Figure 9.** Probability (correspondence) that the isolates correspond to [*Fumigatus*] by primer OPF-01.

$$\text{If} \left( \text{MARCADOR} == \text{"OPC-06"} \Rightarrow \text{ifMax} \left( \begin{array}{ll} \text{Prob}[\text{FLAVUS}] \text{PorMARCADOR} & \Rightarrow \text{"FLAVUS"} \\ \text{Prob}[\text{FUMIGATUS}] \text{PorMARCADOR} & \Rightarrow \text{"FUMIGATUS"} \\ \text{Prob}[\text{NIGER}] \text{PorMARCADOR} & \Rightarrow \text{"NIGER"} \\ \text{Prob}[\text{TUBINGENSIS}] \text{PorMARCADOR} & \Rightarrow \text{"TUBINGENSIS"} \\ \text{else} & \Rightarrow \text{""} \end{array} \right) \right) \\ \text{else} \Rightarrow .$$

**Figure 10.** Equation to determine the most probable species by marker OPF-01.

### OPG-13

$$\text{If} \left( \text{MARCADOR} == \text{"OPG-13"} \Rightarrow -4.62316397 + 1.7673994246 \cdot \text{NUMERO DE BANDAS} + -1.214131683 \cdot \text{INTESIDAD} + -0.003514185 \cdot \text{pb} \right) \\ \text{else} \Rightarrow .$$

**Figure 11.** Linear equation for [*Flavus*] by primer OPG-13.

$$\text{If} \left( \text{MARCADOR} == \text{"OPG-13"} \Rightarrow -7.654680371 + 2.2789634365 \cdot \text{NUMERO DE BANDAS} + -0.990792157 \cdot \text{INTESIDAD} + -0.0047291 \cdot \text{pb} \right) \\ \text{else} \Rightarrow .$$

**Figure 12.** Linear equation for [*Fumigatus*] by primer OPG-13.

$$\text{If} \left( \text{MARCADOR} == \text{"OPG-13"} \Rightarrow -10.63447419 + 2.6631351049 \cdot \text{NUMERO DE BANDAS} + -1.234220583 \cdot \text{INTESIDAD} + -0.003191852 \cdot \text{pb} \right) \\ \text{else} \Rightarrow .$$

**Figure 13.** Linear equation for [Niger] by primer OPG-13.

$$\text{If} \left( \text{MARCADOR} == \text{"OPG-13"} \Rightarrow \frac{1}{1 + \text{Exp}(\text{Lineal}[\text{FLAVUS}] \text{PorMARCADOR}) + \text{Exp}(-\text{Lineal}[\text{FUMIGATUS}] \text{PorMARCADOR}) + \text{Exp}(\text{Lineal}[\text{NIGER}] \text{PorMARCADOR})} \right) \\ \text{else} \Rightarrow .$$

**Figure 14.** Probability (correspondence) that the isolates correspond to [Tubingesis] by primer OPG-13.

$$\text{If} \left( \text{MARCADOR} == \text{"OPG-13"} \Rightarrow \text{ifMax} \left( \begin{array}{ll} \text{Prob}[\text{FLAVUS}] \text{PorMARCADOR} & \Rightarrow \text{"FLAVUS"} \\ \text{Prob}[\text{FUMIGATUS}] \text{PorMARCADOR} & \Rightarrow \text{"FUMIGATUS"} \\ \text{Prob}[\text{NIGER}] \text{PorMARCADOR} & \Rightarrow \text{"NIGER"} \\ \text{Prob}[\text{TUBINGENSIS}] \text{PorMARCADOR} & \Rightarrow \text{"TUBINGENSIS"} \\ \text{else} & \Rightarrow \text{""} \end{array} \right) \right) \\ \text{else} \Rightarrow .$$

**Figure 15.** Equation to determine the most probable species by marker OPG-13.
