# Supplementary material for: Selection of Polymorphic Patterns Obtained by RAPD-PCR through Qualitative and Quantitative Analyses to Differentiate Aspergillus fumigatus
Source: MDPI journal article supplement (doi:10.3390/jof8030296), 2022-03-13
Supplement: s1 [file s1]

Tables S1 (1-3). Mathematical assessment and testing to predict *Aspergillus* species

**Table 1.** Evaluation of the probability equation with primer OPC-06 of Cuban isolates to determine the most probable species with the statistical analysis.

**OPC-06**

| AISLADO       | PRIMER | BANDAS | pb   | Intensidad | Correspondencia<br><i>Flavus</i> | Correspondencia<br><i>Fumigatus</i> | Correspondencia<br><i>Niger</i> | Correspondencia<br><i>Tubingensis</i> | Especie más probable |
|---------------|--------|--------|------|------------|----------------------------------|-------------------------------------|---------------------------------|---------------------------------------|----------------------|
| PRU1FUMCUBANO | OPC-06 | 1      | 150  | 1          | <b>0.87562731</b>                | 0.00934631                          | 0.11199239                      | 0.00303399                            | FLAVUS               |
| PRU1FUMCUBANO | OPC-06 | 2      | 200  | 0.5        | <b>0.8766509</b>                 | 0.00732215                          | 0.11346158                      | 0.00256537                            | FLAVUS               |
| PRU1FUMCUBANO | OPC-06 | 3      | 300  | 0.5        | <b>0.86484428</b>                | 0.00926619                          | 0.12299141                      | 0.00289813                            | FLAVUS               |
| PRU1FUMCUBANO | OPC-06 | 4      | 400  | 0.5        | <b>0.85190284</b>                | 0.01170859                          | 0.13311948                      | 0.00326908                            | FLAVUS               |
| PRU1FUMCUBANO | OPC-06 | 5      | 500  | 0.5        | <b>0.83771509</b>                | 0.01476938                          | 0.14383435                      | 0.00368119                            | FLAVUS               |
| PRU1FUMCUBANO | OPC-06 | 6      | 550  | 0.5        | <b>0.83011632</b>                | 0.01657602                          | 0.14940412                      | 0.00390354                            | FLAVUS               |
| PRU1FUMCUBANO | OPC-06 | 7      | 700  | 0.5        | <b>0.80510627</b>                | 0.02335724                          | 0.16689714                      | 0.00463935                            | FLAVUS               |
| PRU1FUMCUBANO | OPC-06 | 8      | 1000 | 0.5        | <b>0.74355205</b>                | 0.04553377                          | 0.20448015                      | 0.00643404                            | FLAVUS               |
| PRU1FUMCUBANO | OPC-06 | 9      | 1200 | 0.5        | <b>0.69245395</b>                | 0.06977754                          | 0.22991118                      | 0.00785733                            | FLAVUS               |
| PRU1FUMCUBANO | OPC-06 | 1      | 150  | 1          | <b>0.87562731</b>                | 0.00934631                          | 0.11199239                      | 0.00303399                            | FLAVUS               |
| PRU1FUMCUBANO | OPC-06 | 2      | 200  | 0.5        | <b>0.8766509</b>                 | 0.00732215                          | 0.11346158                      | 0.00256537                            | FLAVUS               |
| PRU1FUMCUBANO | OPC-06 | 3      | 300  | 0.5        | <b>0.86484428</b>                | 0.00926619                          | 0.12299141                      | 0.00289813                            | FLAVUS               |
| PRU1FUMCUBANO | OPC-06 | 4      | 400  | 0.5        | <b>0.85190284</b>                | 0.01170859                          | 0.13311948                      | 0.00326908                            | FLAVUS               |
| PRU1FUMCUBANO | OPC-06 | 5      | 500  | 0.5        | <b>0.83771509</b>                | 0.01476938                          | 0.14383435                      | 0.00368119                            | FLAVUS               |
| PRU1FUMCUBANO | OPC-06 | 6      | 550  | 0.5        | <b>0.83011632</b>                | 0.01657602                          | 0.14940412                      | 0.00390354                            | FLAVUS               |
| PRU1FUMCUBANO | OPC-06 | 7      | 700  | 0.5        | <b>0.80510627</b>                | 0.02335724                          | 0.16689714                      | 0.00463935                            | FLAVUS               |
| PRU1FUMCUBANO | OPC-06 | 8      | 1000 | 1          | <b>0.72229925</b>                | 0.06402121                          | 0.20576021                      | 0.00791934                            | FLAVUS               |
| PRU1FUMCUBANO | OPC-06 | 9      | 1200 | 1          | <b>0.66482232</b>                | 0.09696497                          | 0.22865422                      | 0.00955849                            | FLAVUS               |
| PRU1FUMCUBANO | OPC-06 | 1      | 150  | 1          | <b>0.87562731</b>                | 0.00934631                          | 0.11199239                      | 0.00303399                            | FLAVUS               |
| PRU1FUMCUBANO | OPC-06 | 2      | 200  | 0.5        | <b>0.8766509</b>                 | 0.00732215                          | 0.11346158                      | 0.00256537                            | FLAVUS               |
| PRU1FUMCUBANO | OPC-06 | 3      | 300  | 0.5        | <b>0.86484428</b>                | 0.00926619                          | 0.12299141                      | 0.00289813                            | FLAVUS               |

|               |        |   |      |     |                   |            |            |            |        |
|---------------|--------|---|------|-----|-------------------|------------|------------|------------|--------|
| PRU1FUMCUBANO | OPC-06 | 4 | 400  | 0.5 | <b>0.85190284</b> | 0.01170859 | 0.13311948 | 0.00326908 | FLAVUS |
| PRU1FUMCUBANO | OPC-06 | 5 | 500  | 0.5 | <b>0.83771509</b> | 0.01476938 | 0.14383435 | 0.00368119 | FLAVUS |
| PRU1FUMCUBANO | OPC-06 | 6 | 550  | 0.5 | <b>0.83011632</b> | 0.01657602 | 0.14940412 | 0.00390354 | FLAVUS |
| PRU1FUMCUBANO | OPC-06 | 7 | 700  | 0.5 | <b>0.80510627</b> | 0.02335724 | 0.16689714 | 0.00463935 | FLAVUS |
| PRU1FUMCUBANO | OPC-06 | 8 | 1000 | 2   | <b>0.66270937</b> | 0.12305487 | 0.2025705  | 0.01166525 | FLAVUS |
| PRU1FUMCUBANO | OPC-06 | 9 | 1200 | 1   | <b>0.66482232</b> | 0.09696497 | 0.22865422 | 0.00955849 | FLAVUS |
| PRU1FUMCUBANO | OPC-06 | 1 | 150  | 0.5 | <b>0.88216084</b> | 0.00650555 | 0.10892124 | 0.00241237 | FLAVUS |
| PRU1FUMCUBANO | OPC-06 | 2 | 200  | 0.5 | <b>0.8766509</b>  | 0.00732215 | 0.11346158 | 0.00256537 | FLAVUS |
| PRU1FUMCUBANO | OPC-06 | 3 | 300  | 0.5 | <b>0.86484428</b> | 0.00926619 | 0.12299141 | 0.00289813 | FLAVUS |
| PRU1FUMCUBANO | OPC-06 | 4 | 400  | 0.5 | <b>0.85190284</b> | 0.01170859 | 0.13311948 | 0.00326908 | FLAVUS |
| PRU1FUMCUBANO | OPC-06 | 5 | 500  | 0.5 | <b>0.83771509</b> | 0.01476938 | 0.14383435 | 0.00368119 | FLAVUS |
| PRU1FUMCUBANO | OPC-06 | 6 | 550  | 0.5 | <b>0.83011632</b> | 0.01657602 | 0.14940412 | 0.00390354 | FLAVUS |
| PRU1FUMCUBANO | OPC-06 | 7 | 700  | 0.5 | <b>0.80510627</b> | 0.02335724 | 0.16689714 | 0.00463935 | FLAVUS |
| PRU1FUMCUBANO | OPC-06 | 8 | 1000 | 1   | <b>0.72229925</b> | 0.06402121 | 0.20576021 | 0.00791934 | FLAVUS |
| PRU1FUMCUBANO | OPC-06 | 9 | 1200 | 1   | <b>0.66482232</b> | 0.09696497 | 0.22865422 | 0.00955849 | FLAVUS |

**Table 2.** Evaluation of the probability equation with primer OPF-01 of Cuban isolates to determine the most probable species with the statistical analysis.

## OPF-01

| AISLADO       | PRIMER | CODIGO | BANDAS | pb   | Intensidad | Correspondencia<br><i>Flavus</i> | Correspondencia<br><i>Fumigatus</i> | Correspondencia<br><i>Niger</i> | Correspondencia<br><i>Tubingesis</i> | Especie más probable |
|---------------|--------|--------|--------|------|------------|----------------------------------|-------------------------------------|---------------------------------|--------------------------------------|----------------------|
| PRU3FUMCUBANO | OPF-01 | FC1    | 1      | 450  | 0.5        | 2.07E-10                         | <b>1</b>                            | 3.57E-11                        | 1.44E-10                             | FUMIGATUS            |
| PRU3FUMCUBANO | OPF-01 | FC1    | 2      | 500  | 0.5        | 1.99E-10                         | <b>1</b>                            | 3.61E-11                        | 1.42E-10                             | FUMIGATUS            |
| PRU3FUMCUBANO | OPF-01 | FC1    | 3      | 600  | 1          | 2.47E-11                         | <b>1</b>                            | 5.94E-12                        | 2.35E-11                             | FUMIGATUS            |
| PRU3FUMCUBANO | OPF-01 | FC1    | 4      | 800  | 0.5        | 1.58E-10                         | <b>1</b>                            | 3.81E-11                        | 1.26E-10                             | FUMIGATUS            |
| PRU3FUMCUBANO | OPF-01 | FC1    | 5      | 900  | 2          | 3.54E-13                         | <b>1</b>                            | 1.64E-13                        | 6.26E-13                             | FUMIGATUS            |
| PRU3FUMCUBANO | OPF-01 | FC1    | 6      | 1000 | 2          | 3.28E-13                         | <b>1</b>                            | 1.67E-13                        | 6.01E-13                             | FUMIGATUS            |
| PRU3FUMCUBANO | OPF-01 | FC1    | 7      | 1000 | 2          | 3.28E-13                         | <b>1</b>                            | 1.67E-13                        | 6.01E-13                             | FUMIGATUS            |

|               |        |     |   |      |     |          |   |          |          |           |
|---------------|--------|-----|---|------|-----|----------|---|----------|----------|-----------|
| PRU3FUMCUBANO | OPF-01 | FC1 | 8 | 1200 | 0.5 | 1.16E-10 | 1 | 4.10E-11 | 1.07E-10 | FUMIGATUS |
| PRU3FUMCUBANO | OPF-01 | FC1 | 9 | 1300 | 1   | 1.45E-11 | 1 | 6.75E-12 | 1.78E-11 | FUMIGATUS |
| PRU3FUMCUBANO | OPF-01 | FC2 | 1 | 450  | 0.5 | 2.07E-10 | 1 | 3.57E-11 | 1.44E-10 | FUMIGATUS |
| PRU3FUMCUBANO | OPF-01 | FC2 | 2 | 500  | 0.5 | 1.99E-10 | 1 | 3.61E-11 | 1.42E-10 | FUMIGATUS |
| PRU3FUMCUBANO | OPF-01 | FC2 | 3 | 600  | 1   | 2.47E-11 | 1 | 5.94E-12 | 2.35E-11 | FUMIGATUS |
| PRU3FUMCUBANO | OPF-01 | FC2 | 4 | 800  | 0.5 | 1.58E-10 | 1 | 3.81E-11 | 1.26E-10 | FUMIGATUS |
| PRU3FUMCUBANO | OPF-01 | FC2 | 5 | 900  | 2   | 3.54E-13 | 1 | 1.64E-13 | 6.26E-13 | FUMIGATUS |
| PRU3FUMCUBANO | OPF-01 | FC2 | 6 | 1000 | 2   | 3.28E-13 | 1 | 1.67E-13 | 6.01E-13 | FUMIGATUS |
| PRU3FUMCUBANO | OPF-01 | FC2 | 7 | 1000 | 2   | 3.28E-13 | 1 | 1.67E-13 | 6.01E-13 | FUMIGATUS |
| PRU3FUMCUBANO | OPF-01 | FC2 | 8 | 1200 | 0.5 | 1.16E-10 | 1 | 4.10E-11 | 1.07E-10 | FUMIGATUS |
| PRU3FUMCUBANO | OPF-01 | FC2 | 9 | 1300 | 1   | 1.45E-11 | 1 | 6.75E-12 | 1.78E-11 | FUMIGATUS |
| PRU3FUMCUBANO | OPF-01 | FC3 | 1 | 450  | 0.5 | 2.07E-10 | 1 | 3.57E-11 | 1.44E-10 | FUMIGATUS |
| PRU3FUMCUBANO | OPF-01 | FC3 | 2 | 500  | 0.5 | 1.99E-10 | 1 | 3.61E-11 | 1.42E-10 | FUMIGATUS |
| PRU3FUMCUBANO | OPF-01 | FC3 | 3 | 600  | 1   | 2.47E-11 | 1 | 5.94E-12 | 2.35E-11 | FUMIGATUS |
| PRU3FUMCUBANO | OPF-01 | FC3 | 4 | 800  | 0.5 | 1.58E-10 | 1 | 3.81E-11 | 1.26E-10 | FUMIGATUS |
| PRU3FUMCUBANO | OPF-01 | FC3 | 5 | 900  | 2   | 3.54E-13 | 1 | 1.64E-13 | 6.26E-13 | FUMIGATUS |
| PRU3FUMCUBANO | OPF-01 | FC3 | 6 | 1000 | 2   | 3.28E-13 | 1 | 1.67E-13 | 6.01E-13 | FUMIGATUS |
| PRU3FUMCUBANO | OPF-01 | FC3 | 7 | 1000 | 2   | 3.28E-13 | 1 | 1.67E-13 | 6.01E-13 | FUMIGATUS |
| PRU3FUMCUBANO | OPF-01 | FC3 | 8 | 1200 | 0.5 | 1.16E-10 | 1 | 4.10E-11 | 1.07E-10 | FUMIGATUS |
| PRU3FUMCUBANO | OPF-01 | FC3 | 9 | 1300 | 1   | 1.45E-11 | 1 | 6.75E-12 | 1.78E-11 | FUMIGATUS |
| PRU3FUMCUBANO | OPF-01 | FC4 | 1 | 450  | 0.5 | 2.07E-10 | 1 | 3.57E-11 | 1.44E-10 | FUMIGATUS |
| PRU3FUMCUBANO | OPF-01 | FC4 | 2 | 500  | 0.5 | 1.99E-10 | 1 | 3.61E-11 | 1.42E-10 | FUMIGATUS |
| PRU3FUMCUBANO | OPF-01 | FC4 | 3 | 600  | 1   | 2.47E-11 | 1 | 5.94E-12 | 2.35E-11 | FUMIGATUS |
| PRU3FUMCUBANO | OPF-01 | FC4 | 4 | 800  | 0.5 | 1.58E-10 | 1 | 3.81E-11 | 1.26E-10 | FUMIGATUS |
| PRU3FUMCUBANO | OPF-01 | FC4 | 5 | 900  | 2   | 3.54E-13 | 1 | 1.64E-13 | 6.26E-13 | FUMIGATUS |
| PRU3FUMCUBANO | OPF-01 | FC4 | 6 | 1000 | 2   | 3.28E-13 | 1 | 1.67E-13 | 6.01E-13 | FUMIGATUS |
| PRU3FUMCUBANO | OPF-01 | FC4 | 7 | 1000 | 2   | 3.28E-13 | 1 | 1.67E-13 | 6.01E-13 | FUMIGATUS |
| PRU3FUMCUBANO | OPF-01 | FC4 | 8 | 1200 | 0.5 | 1.16E-10 | 1 | 4.10E-11 | 1.07E-10 | FUMIGATUS |
| PRU3FUMCUBANO | OPF-01 | FC4 | 9 | 1300 | 1   | 1.45E-11 | 1 | 6.75E-12 | 1.78E-11 | FUMIGATUS |

**Table 3.** Evaluation of the probability equation with primer OPG-13 of Cuban isolates to determine the most probable species with the statistical analysis.

## OPG-13

| AISLADO       | PRIMER | CODIGO | BANDAS | pb       | Intensidad | Correspondencia <i>Flavus</i> | Correspondencia <i>Fumigatus</i> | Correspondencia <i>Niger</i> | Correspondencia <i>Tubingensis</i> | Especie más probable |
|---------------|--------|--------|--------|----------|------------|-------------------------------|----------------------------------|------------------------------|------------------------------------|----------------------|
| PRU1FUMCUBANO | OPG-13 | TubC1  | 1      | 450      | 0.5        | 0.03623853                    | 0.00314777                       | 0.00060975                   | <b>0.96000395</b>                  | TUBINGENSIS          |
| PRU1FUMCUBANO | OPG-13 | TubC1  | 2      | 500      | 0.5        | 0.03060085                    | 0.0025014                        | 0.00052325                   | <b>0.96637449</b>                  | TUBINGENSIS          |
| PRU1FUMCUBANO | OPG-13 | TubC2  | 1      | 450      | 0.5        | 0.03623853                    | 0.00314777                       | 0.00060975                   | <b>0.96000395</b>                  | TUBINGENSIS          |
| PRU1FUMCUBANO | OPG-13 | TubC2  | 2      | 500      | 0.5        | 0.03060085                    | 0.0025014                        | 0.00052325                   | <b>0.96637449</b>                  | TUBINGENSIS          |
| PRU1FUMCUBANO | OPG-13 | TubC3  | 1      | 450      | 0.5        | 0.03623853                    | 0.00314777                       | 0.00060975                   | <b>0.96000395</b>                  | TUBINGENSIS          |
| PRU1FUMCUBANO | OPG-13 | TubC3  | 2      | 500      | 0.5        | 0.03060085                    | 0.0025014                        | 0.00052325                   | <b>0.96637449</b>                  | TUBINGENSIS          |
| PRU1FUMCUBANO | OPG-13 | NC1    | 1      | 120<br>0 | 0.5        | 0.00046182                    | 9.67E-06                         | 4.04E-06                     | <b>0.99952447</b>                  | TUBINGENSIS          |
| PRU1FUMCUBANO | OPG-13 | NC2    | 1      | 120<br>0 | 0.5        | 0.00046182                    | 9.67E-06                         | 4.04E-06                     | <b>0.99952447</b>                  | TUBINGENSIS          |
