# Supplementary material for: Selection of Polymorphic Patterns Obtained by RAPD-PCR through Qualitative and Quantitative Analyses to Differentiate Aspergillus fumigatus
Source: MDPI journal article supplement (doi:10.3390/jof8030296), 2022-03-13
Supplement: s1 [file s1]

Figures S1 . Macro and micro morphological characteristics of the isolates used in this work.

| SECTION         | MACROSCOPIC MORPHOLOGY                                                              |                                                                                      | MICROSCOPIC MORPHOLOGY                                                                |
|-----------------|-------------------------------------------------------------------------------------|--------------------------------------------------------------------------------------|---------------------------------------------------------------------------------------|
|                 | OBVERSE                                                                             | BACK                                                                                 |                                                                                       |
| <i>Flavi</i>    |                                                                                     |                                                                                      |                                                                                       |
| 323C            |    |    |    |
| 87A             |    |    |    |
| A40             |   |   |   |
| 370B            |  |  |  |
| <i>Fumigati</i> |                                                                                     |                                                                                      |                                                                                       |
| MM12            |  |  |  |

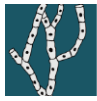

|              | MACROSCOPIC MORPHOLOGY                                                              |                                                                                      | MICROSCOPIC MORPHOLOGY                                                                |
|--------------|-------------------------------------------------------------------------------------|--------------------------------------------------------------------------------------|---------------------------------------------------------------------------------------|
| MM16         | 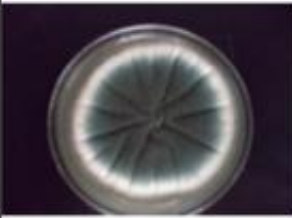   |    |    |
| MM18         |    |    |    |
| MM21         |   |   |   |
| <i>Nigri</i> |                                                                                     |                                                                                      |                                                                                       |
| 387A         |  |  |  |
| A39          |  |  |  |

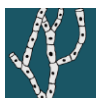

|      | MACROSCOPIC MORPHOLOGY |  | MICROSCOPIC MORPHOLOGY |
|------|------------------------|--|------------------------|
| 335B |                        |  |                        |
| 88C  |                        |  |                        |
| 281C |                        |  |                        |
| 146A |                        |  |                        |
| A26  |                        |  |                        |
| 220A |                        |  |                        |
