# Supplementary material for: Selection of Polymorphic Patterns Obtained by RAPD-PCR through Qualitative and Quantitative Analyses to Differentiate Aspergillus fumigatus
Source: MDPI journal article supplement (doi:10.3390/jof8030296), 2022-03-13
Supplement: s1 [file s1]

Figures S2 (1-43). Polymorphic patterns obtained by RAPD-PCR for the four species with the 34 oligonucleotides

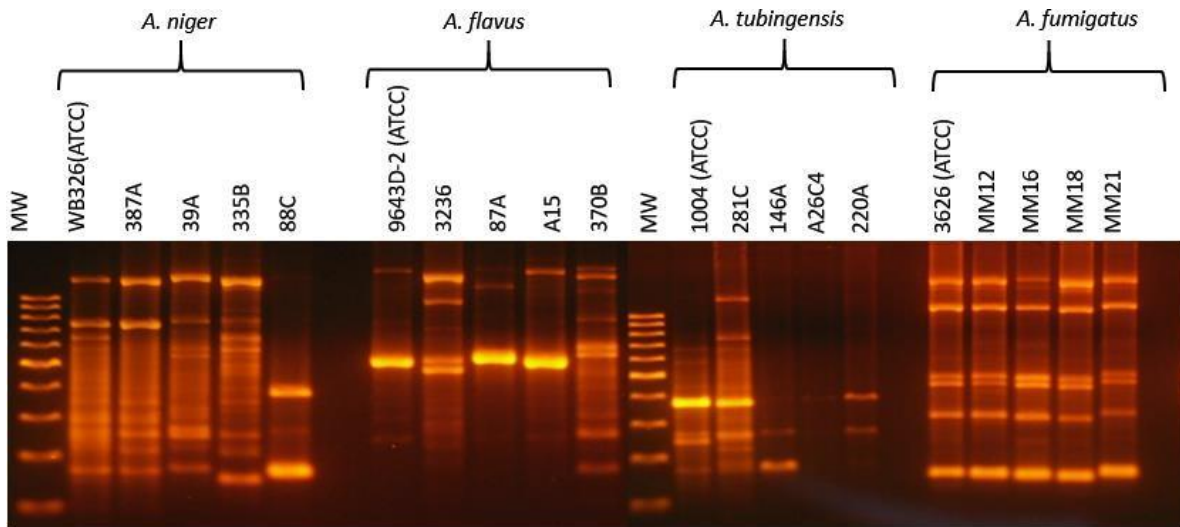

Figure 1. RAPD-PCR of polymorphic patterns of *Aspergillus* isolates with primer OPA-19.

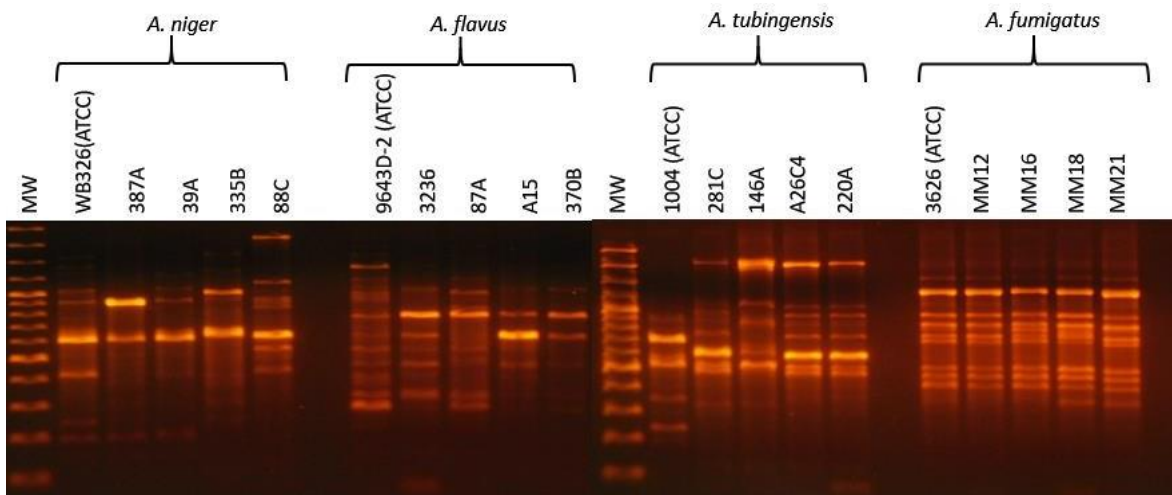

Figure 2. RAPD-PCR of polymorphic patterns of *Aspergillus* isolates with primer OPF-01.

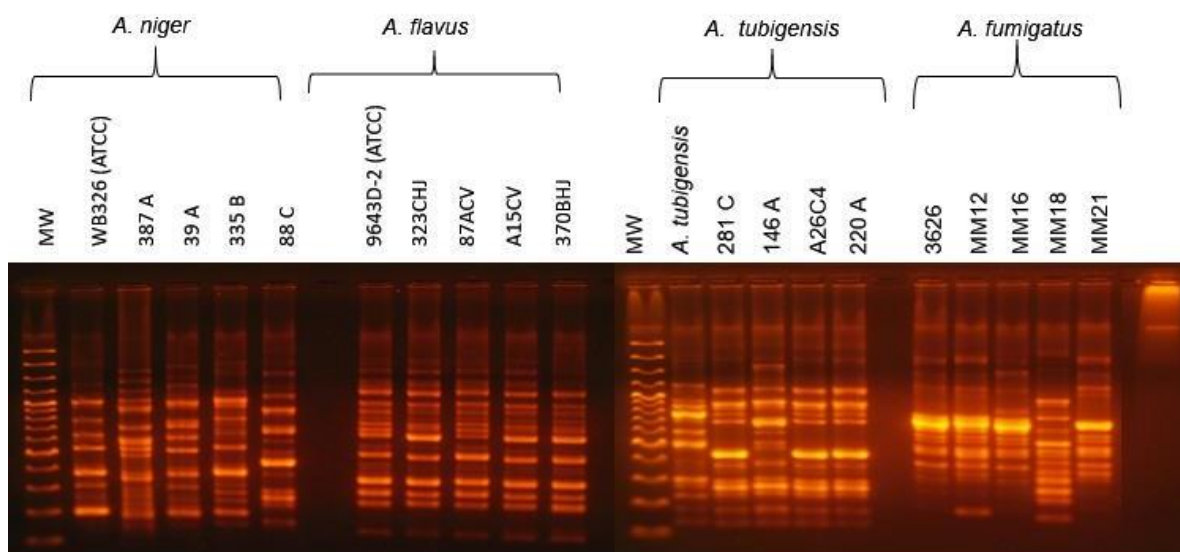

Figure 3. RAPD-PCR of polymorphic patterns of *Aspergillus* isolates with primer P54.

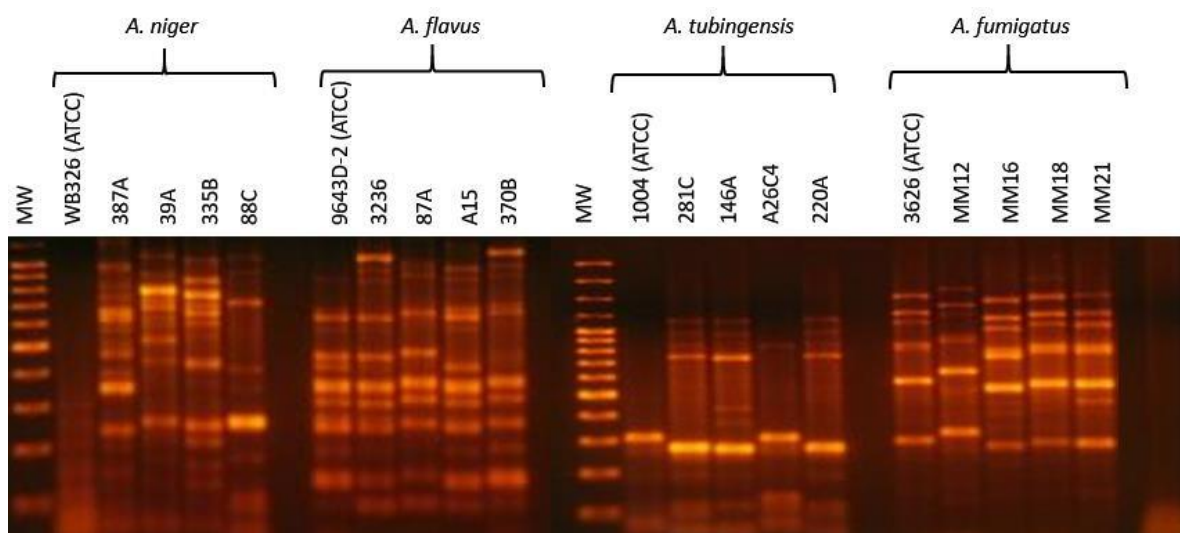

Figure 4. RAPD-PCR of polymorphic patterns of *Aspergillus* isolates with primer OPC-06.

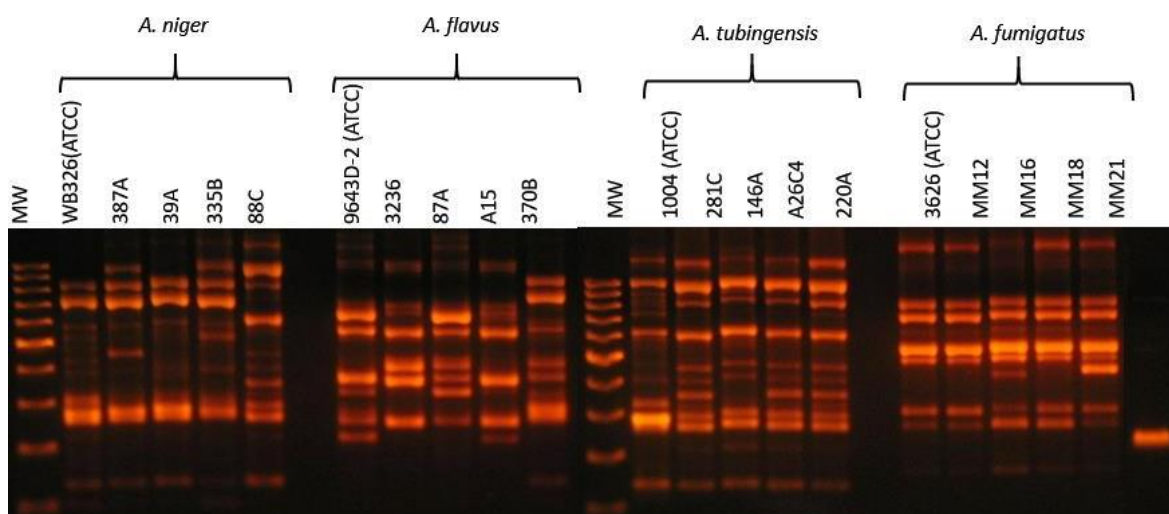

**Figure 5.** RAPD-PCR of polymorphic patterns of *Aspergillus* isolates with primer 1253.

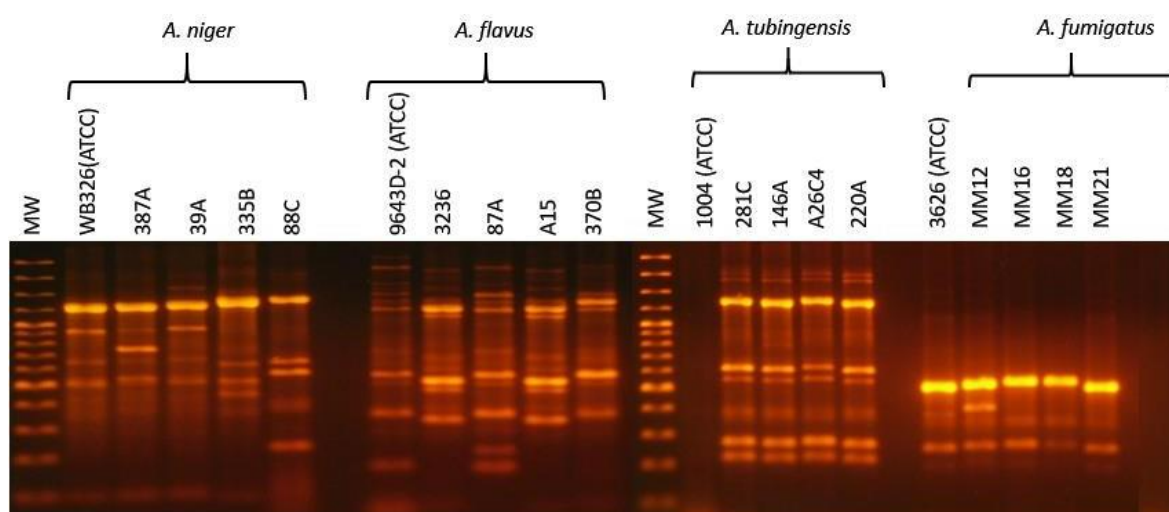

**Figure 6.** RAPD-PCR of polymorphic patterns of *Aspergillus* isolates with primer OPF-07.

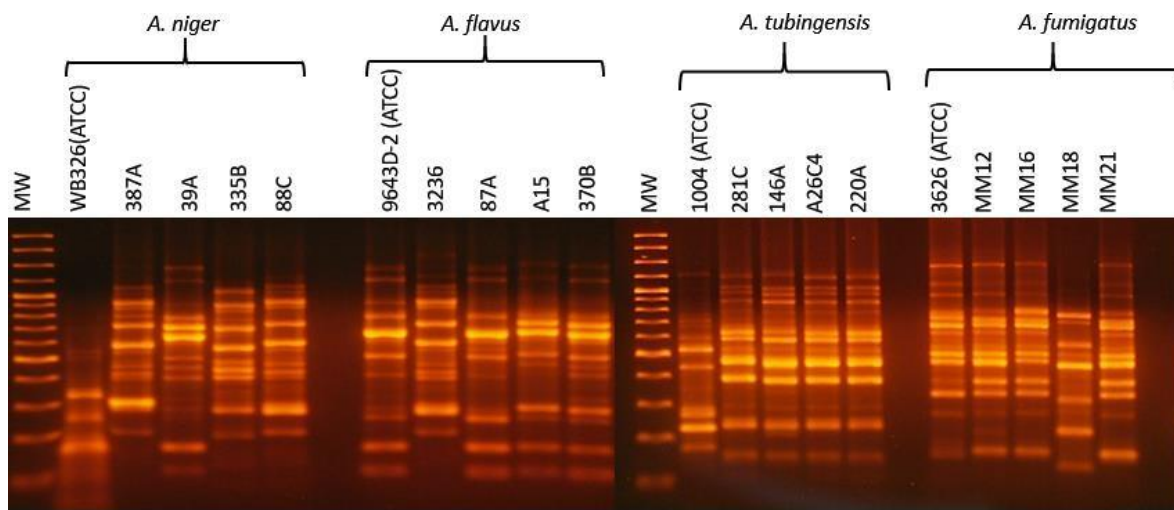

Figure 7. RAPD-PCR of polymorphic patterns of *Aspergillus* isolates with primer OPA-02.

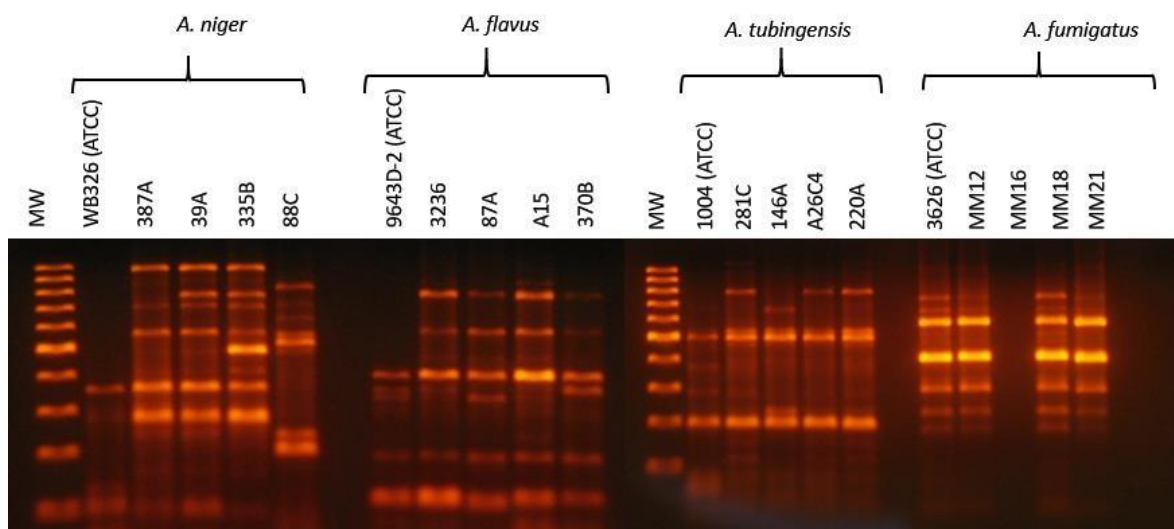

Figure 8. RAPD-PCR of polymorphic patterns of *Aspergillus* isolates with primer OPG-13.



MW 1 2 3 4 5 6 7 8 9 10 11 MW

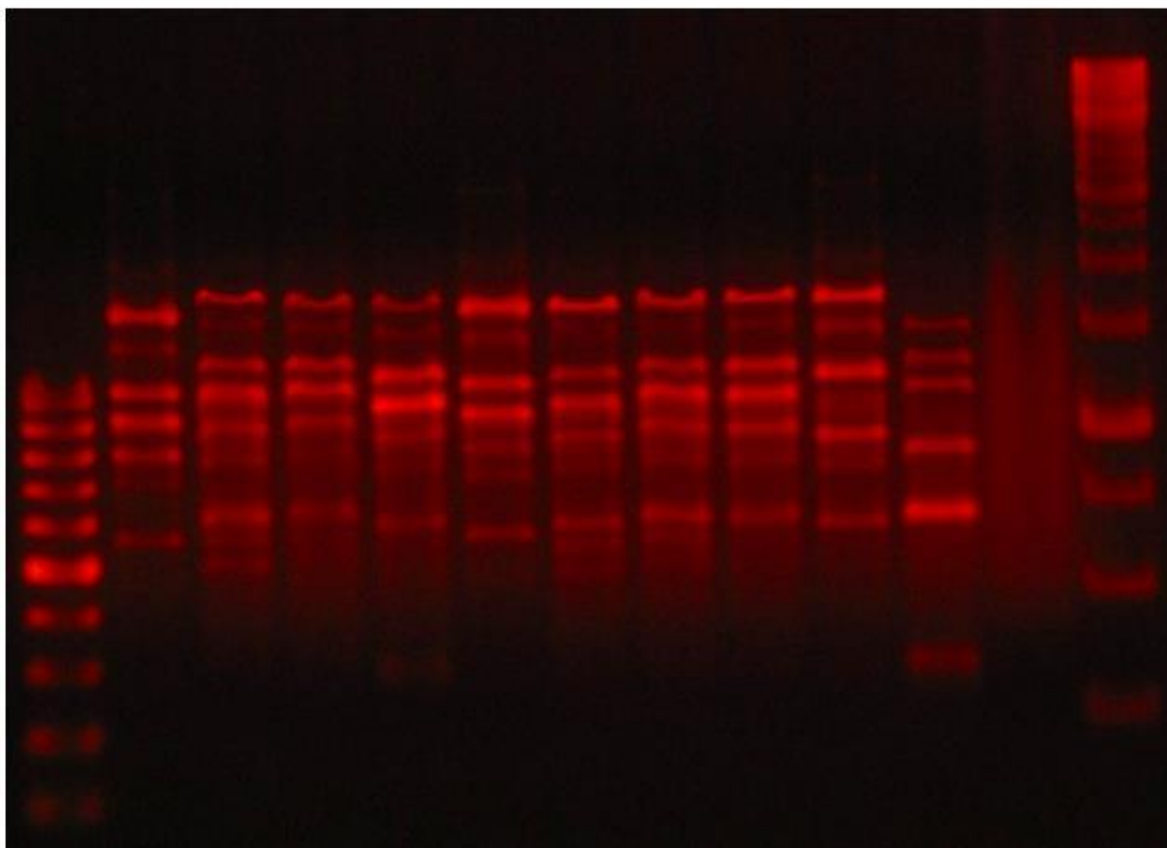

**Figure 9.** Comparison of polymorphic patterns of *A. fumigatus* isolates of different geographic origin and *A. lentulus* with primer OPF-01. Reference strain (ATCC) (line 1), Mexican isolates (line 2-5), Cuban isolates (6-9), *A. lentulus* (ATCC) (line 10).

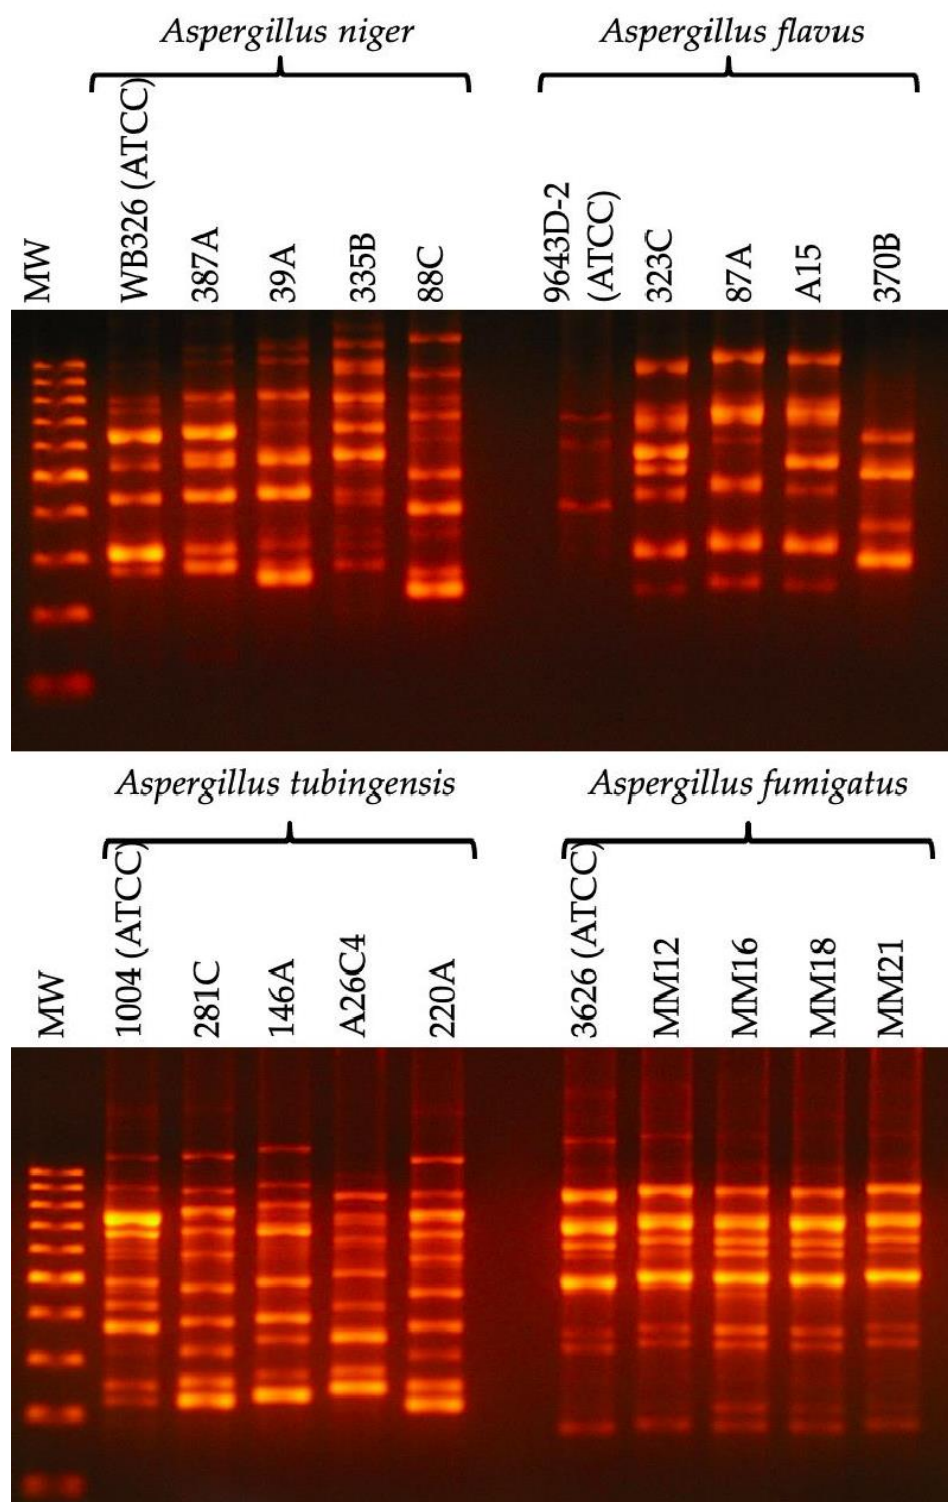

**Figure 10.** Polymorphic patterns obtained by RAPD-PCR for the four species with oligonucleotide 1281.

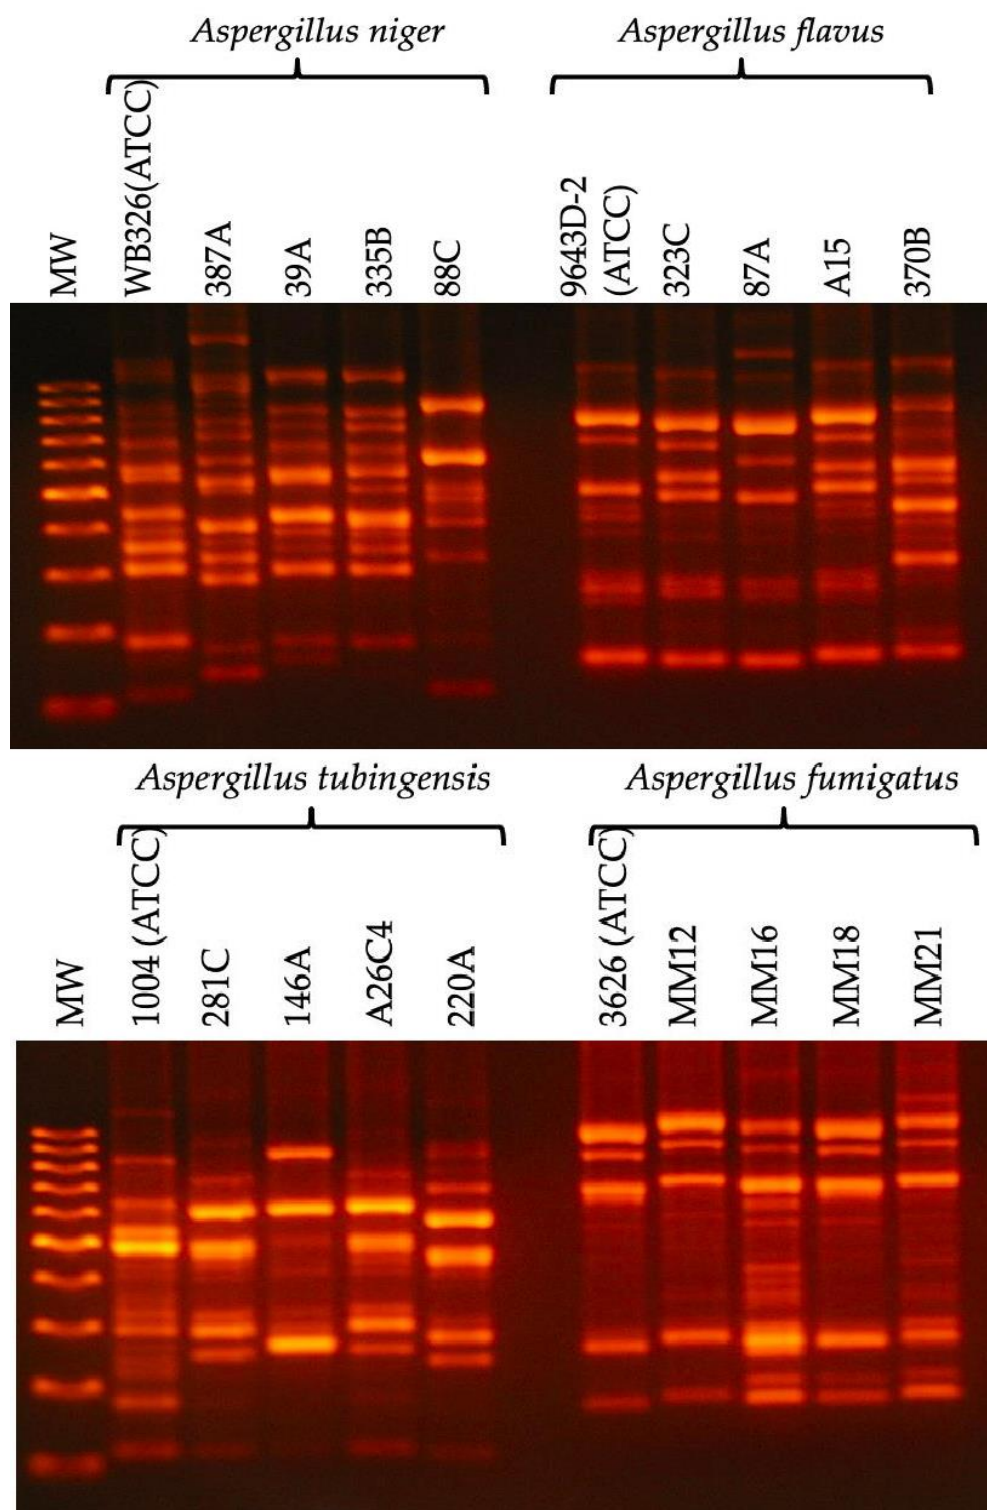

**Figure 11.** Polymorphic patterns obtained by RAPD-PCR for the four species with oligonucleotide 1283.

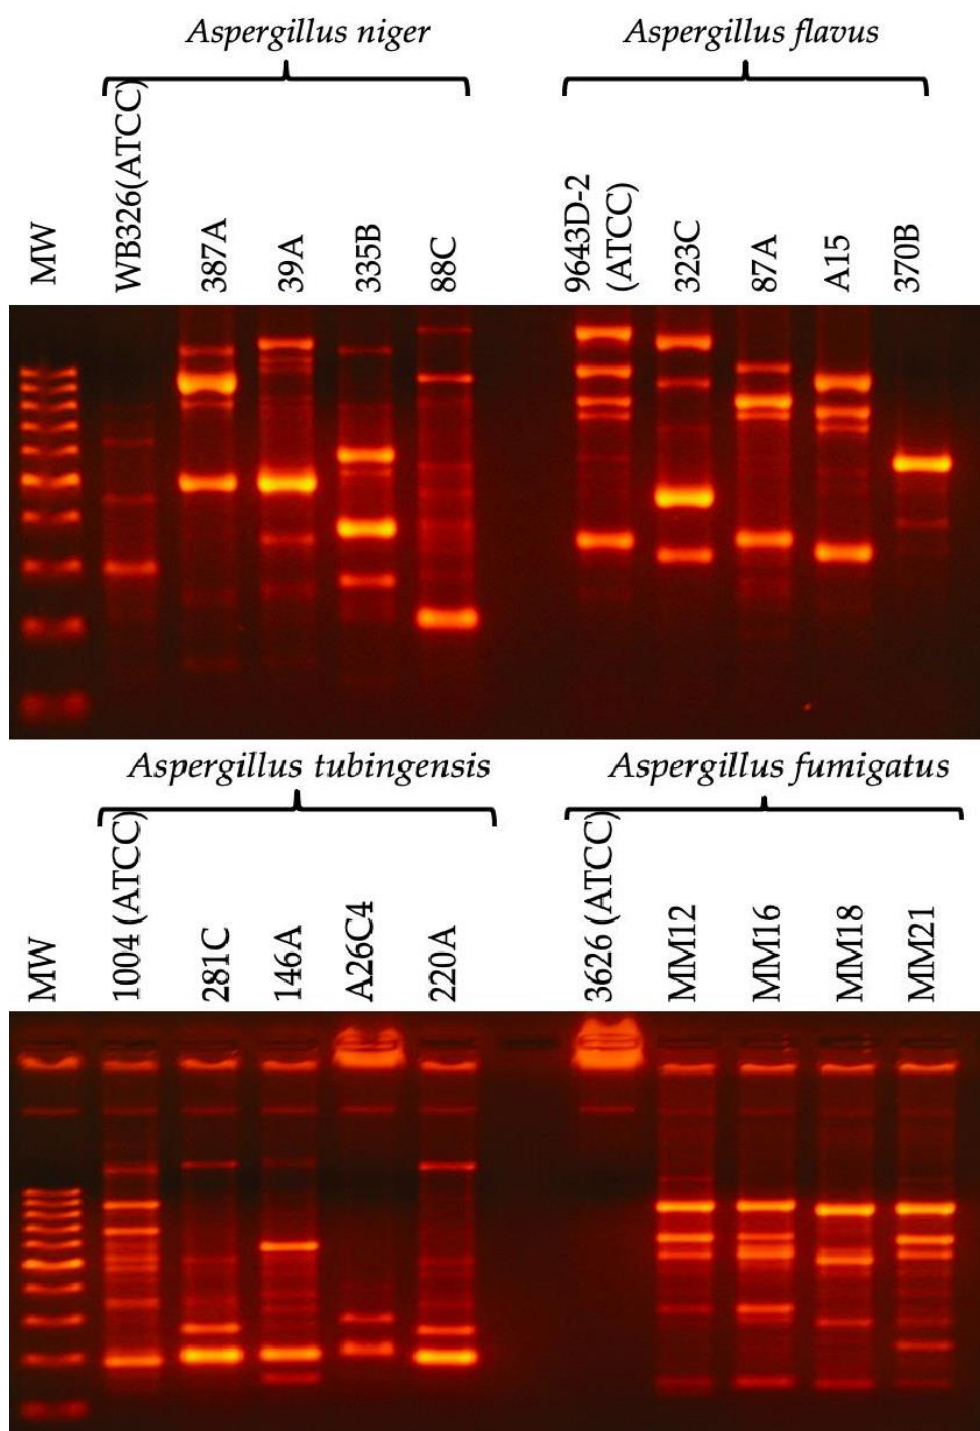

**Figure 12.** Polymorphic patterns obtained by RAPD-PCR for the four species with oligonucleotide R108.



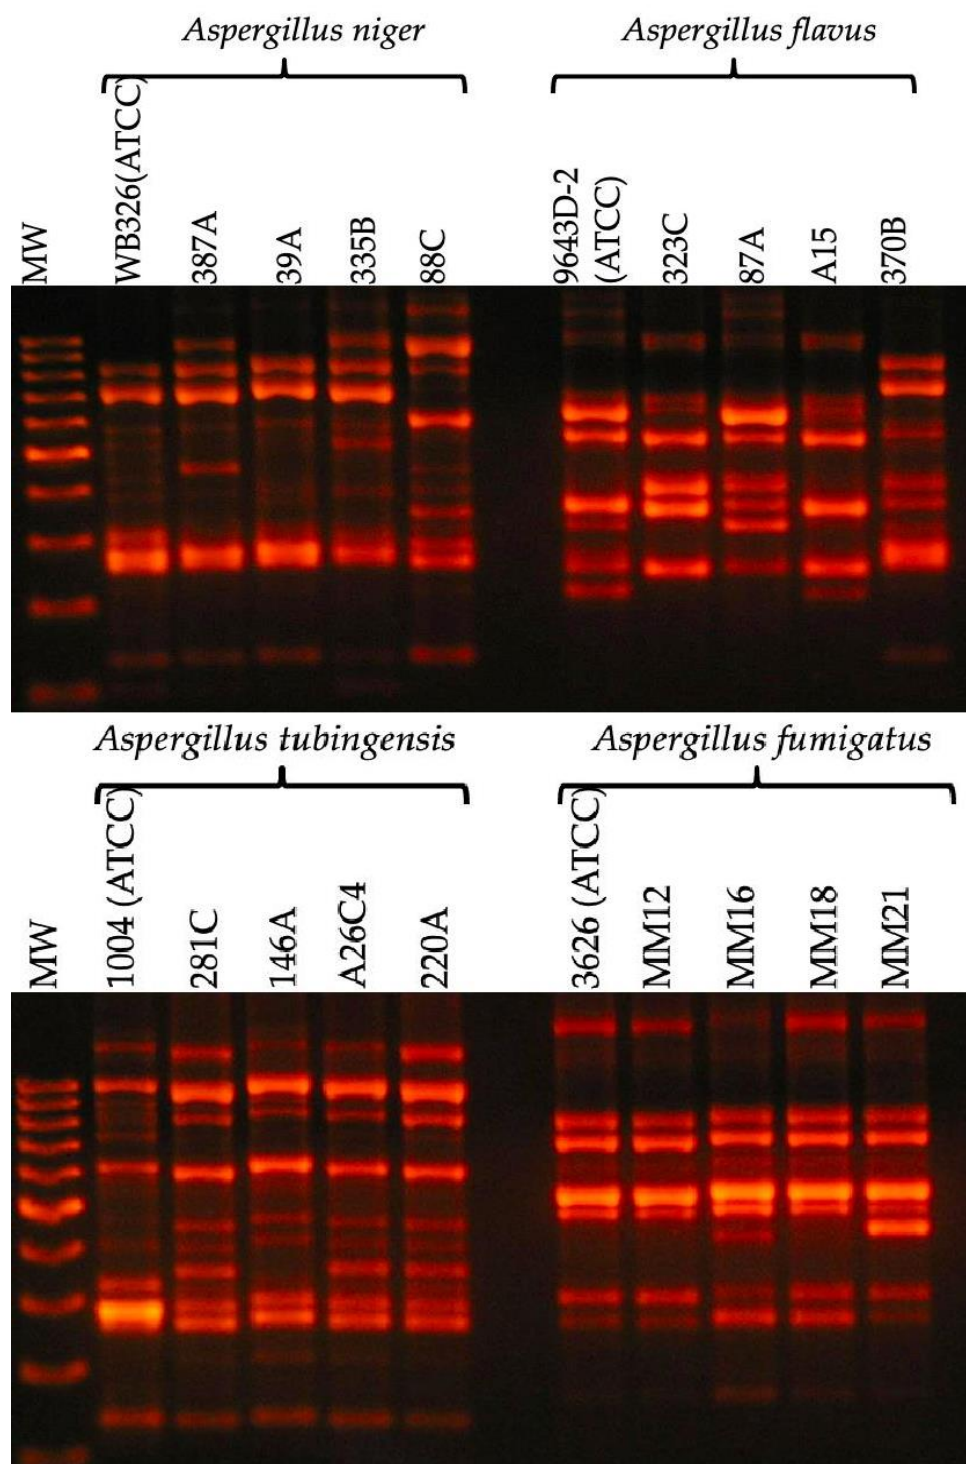

**Figure 13.** Polymorphic patterns obtained by RAPD-PCR for the four species with oligonucleotide 1253.

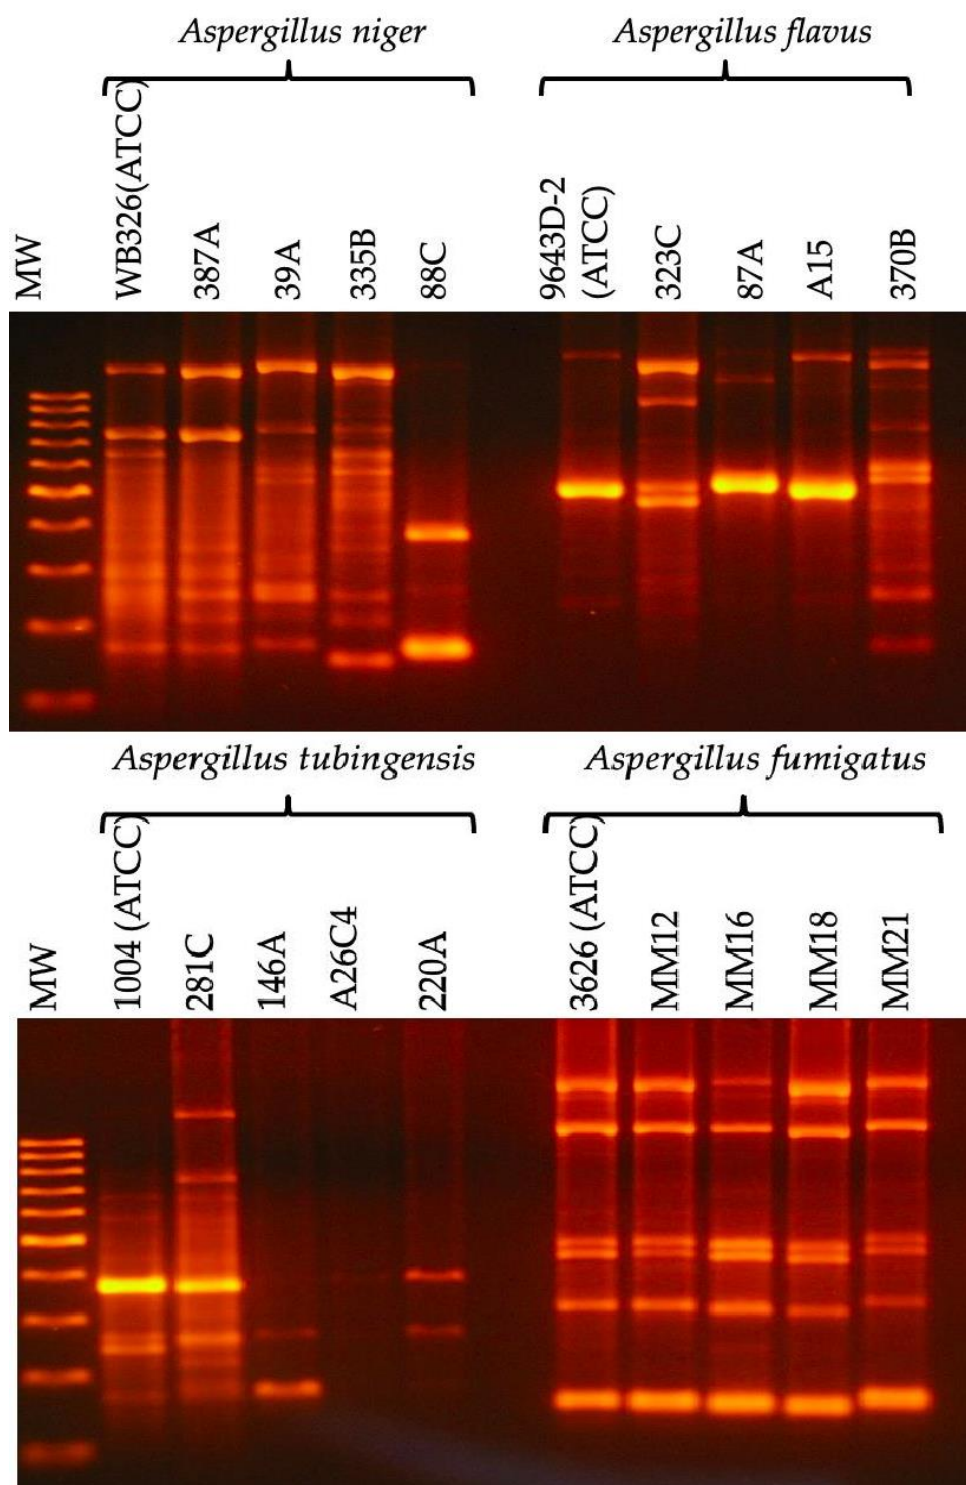

**Figure 14.** Polymorphic patterns obtained by RAPD-PCR for the four species with oligonucleotide OPA-19.

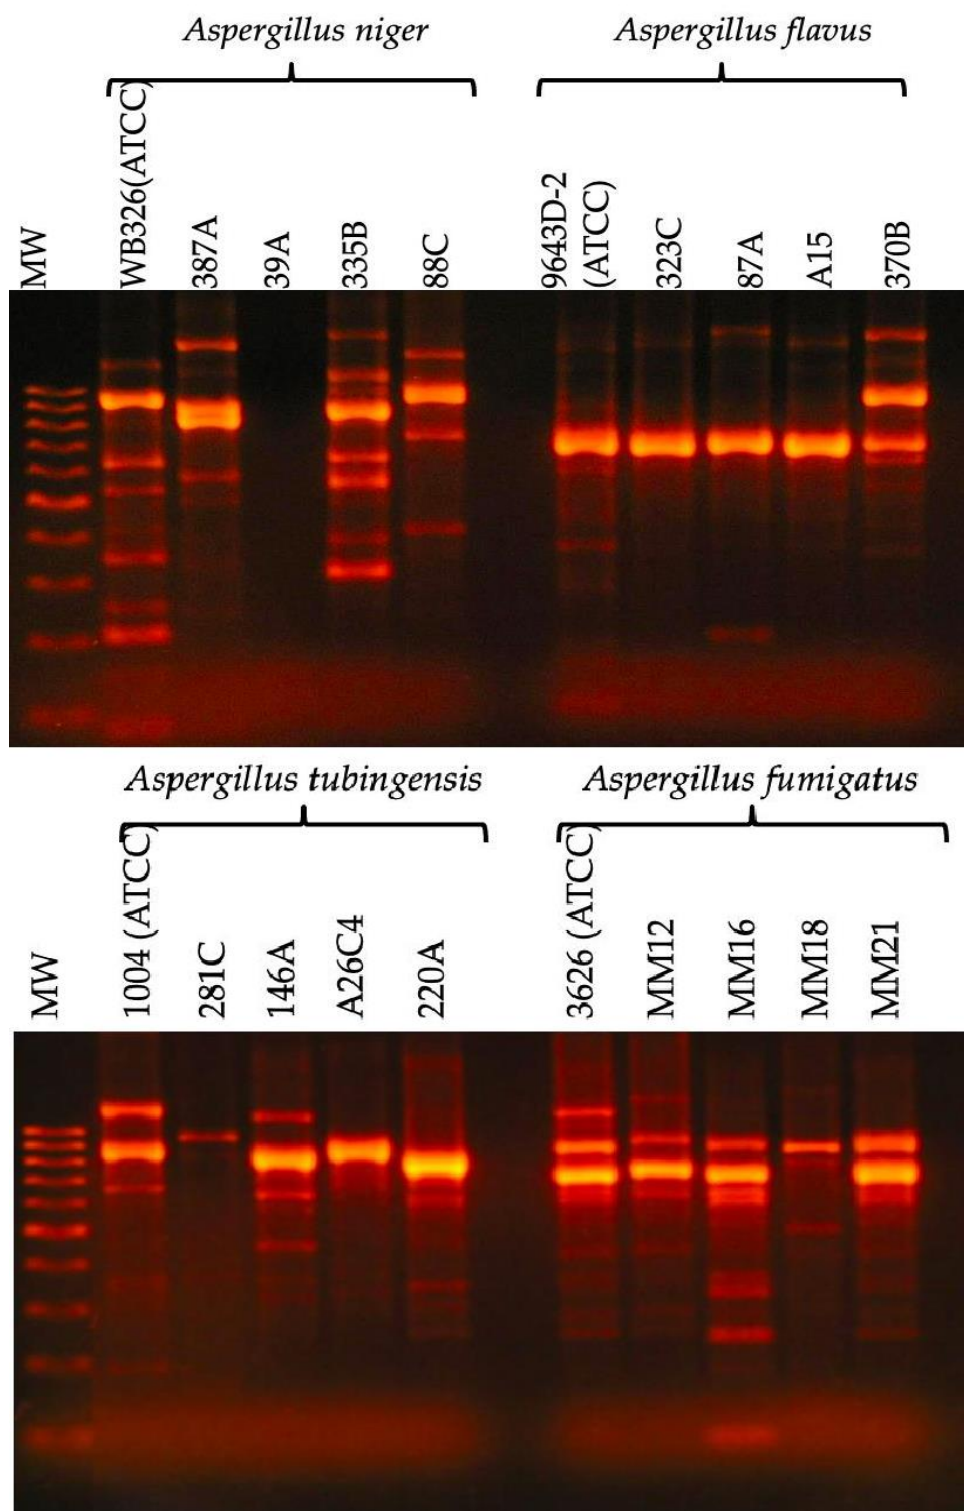

**Figure 15.** Polymorphic patterns obtained by RAPD-PCR for the four species with oligonucleotide OPA-16.



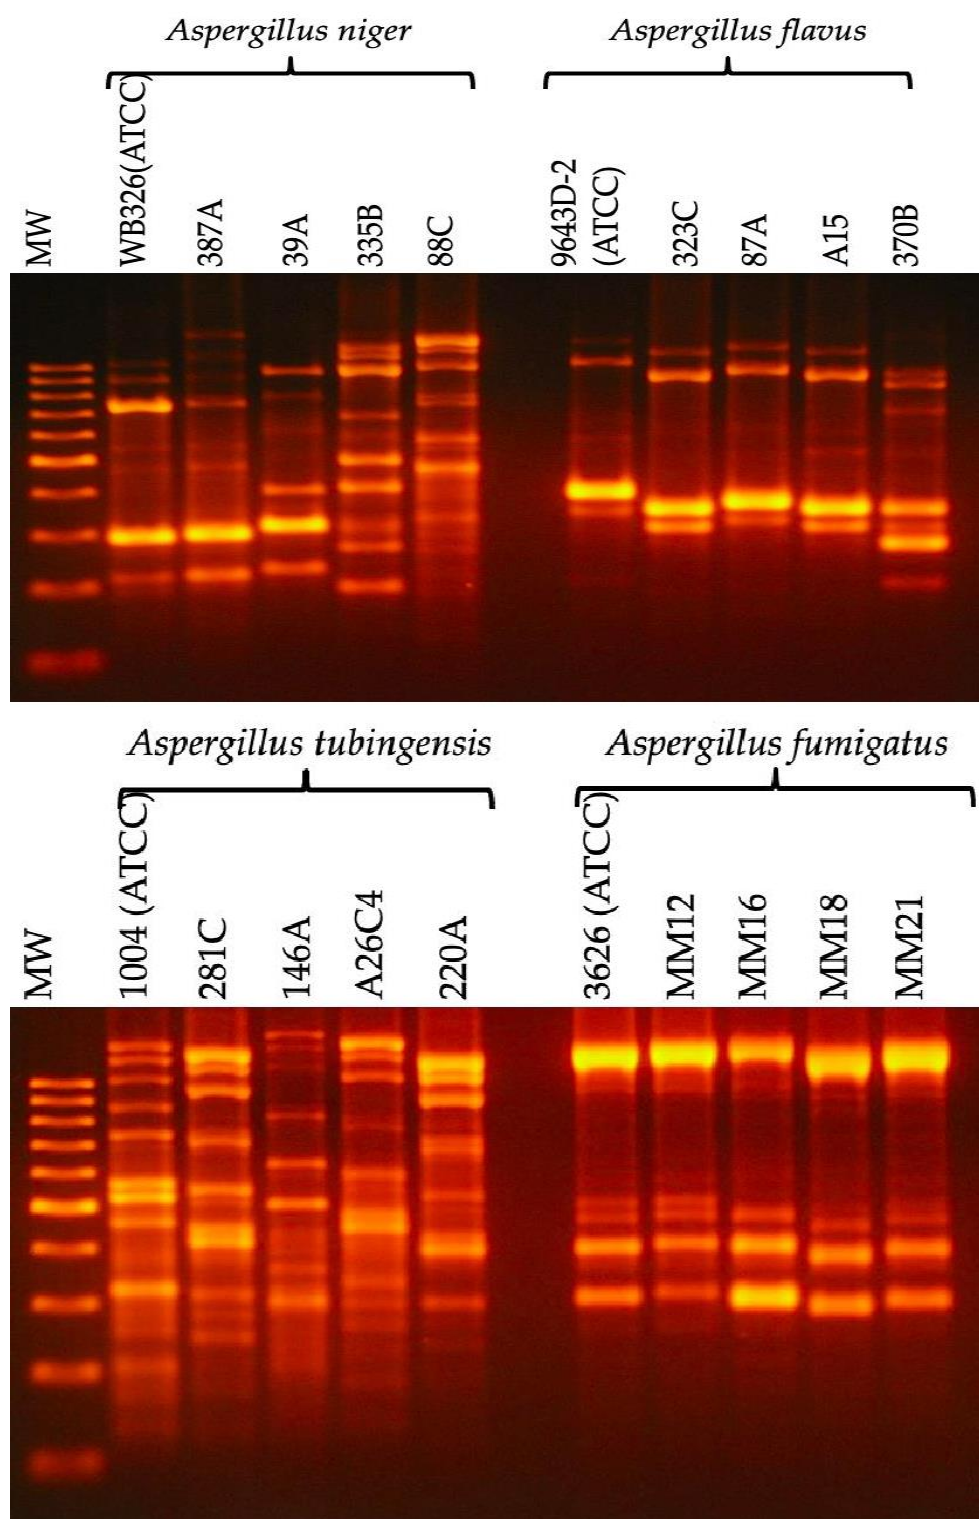

**Figure 16.** Polymorphic patterns obtained by RAPD-PCR for the four species with oligonucleotide OPB-12.



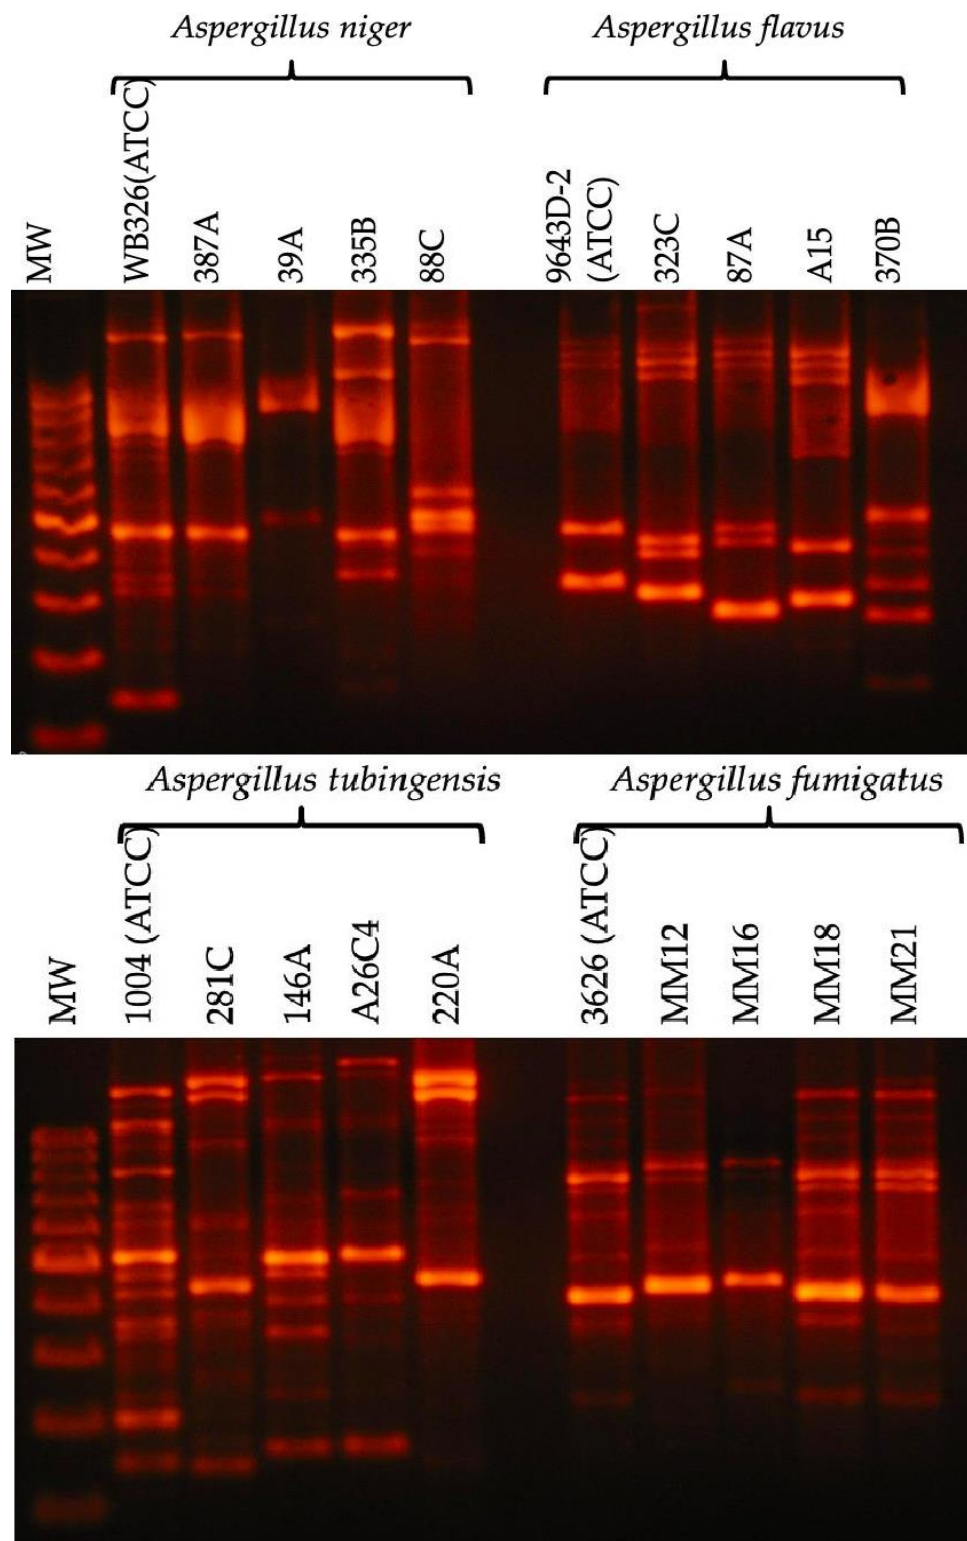

**Figure 17.** Polymorphic patterns obtained by RAPD-PCR for the four species with oligonucleotide OPA-17.

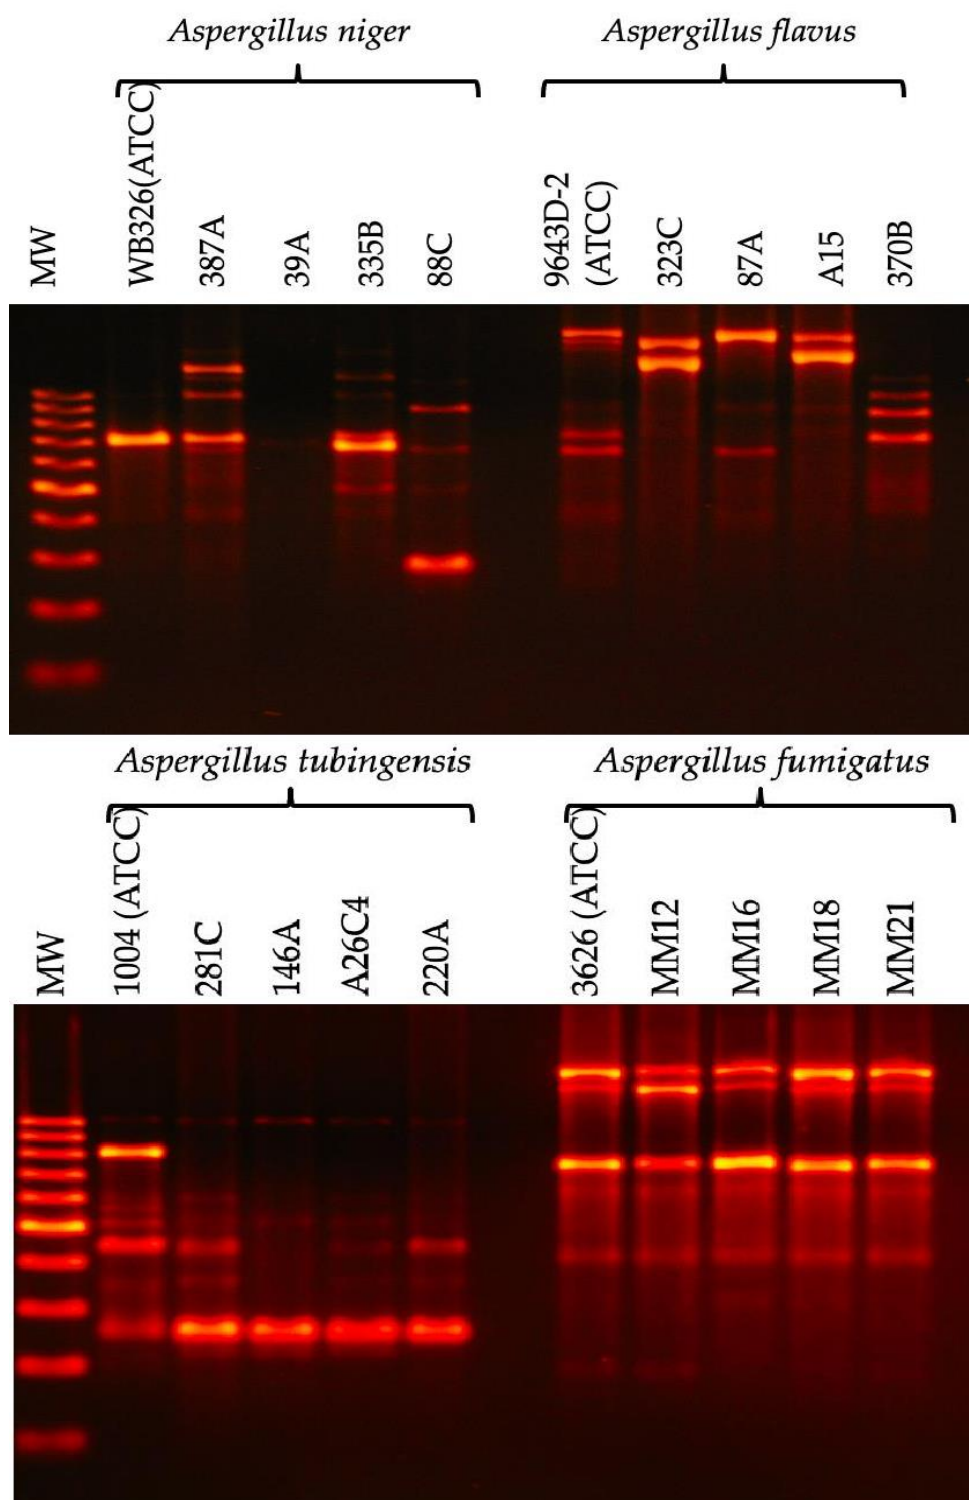

**Figure 18.** Polymorphic patterns obtained by RAPD-PCR for the four species with oligonucleotide OPA-15.

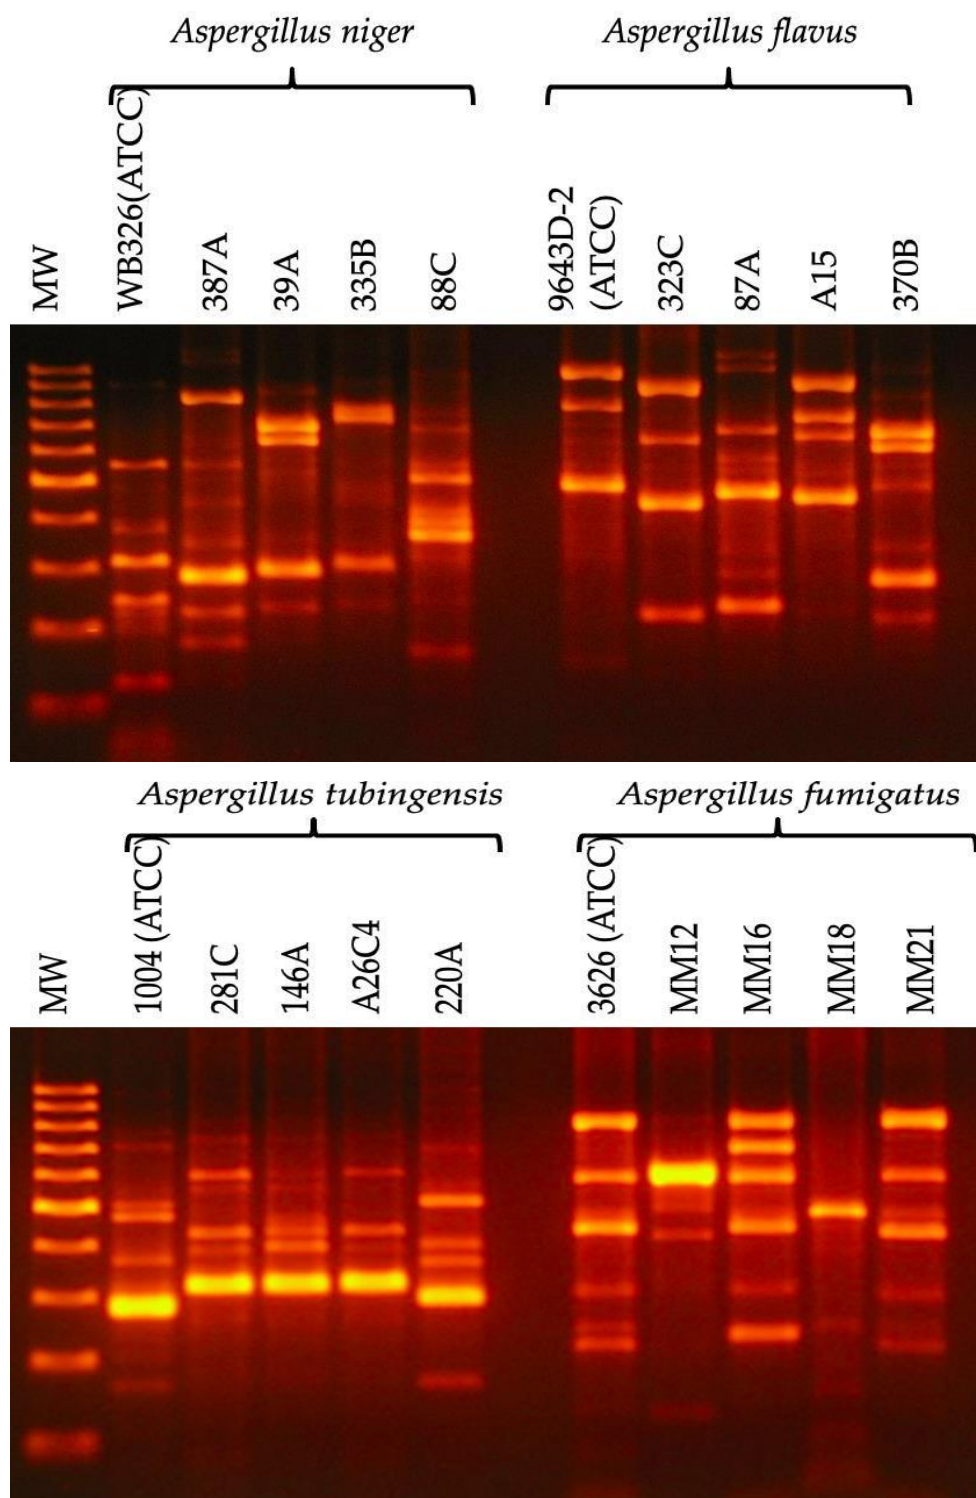

**Figure 19.** Polymorphic patterns obtained by RAPD-PCR for the four species with oligonucleotide OPF-05.

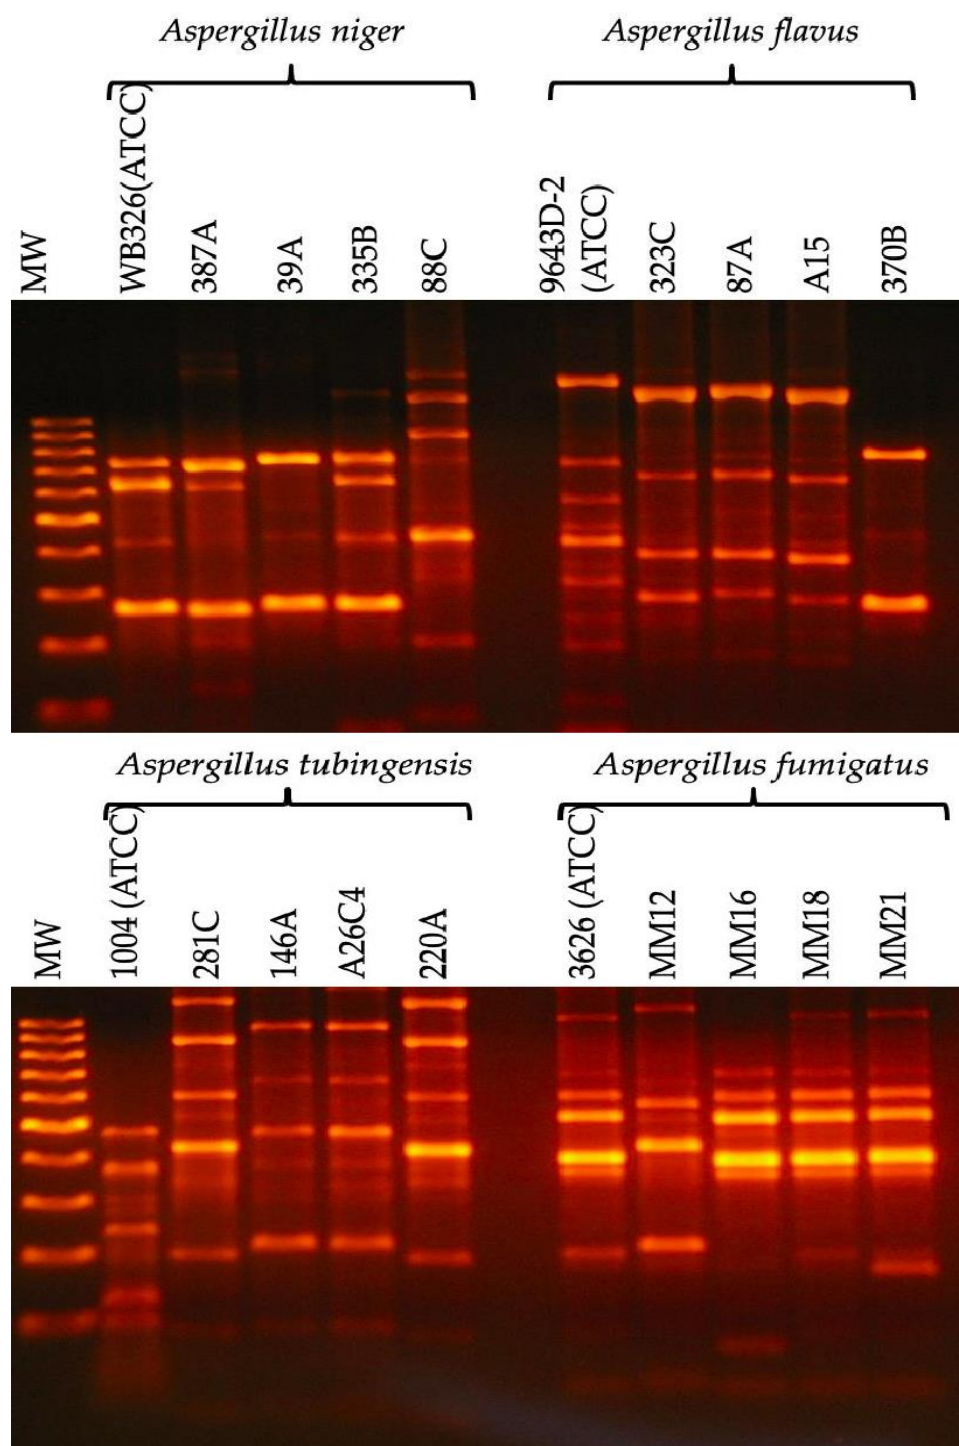

**Figure 20.** Polymorphic patterns obtained by RAPD-PCR for the four species with oligonucleotide OPA-08.



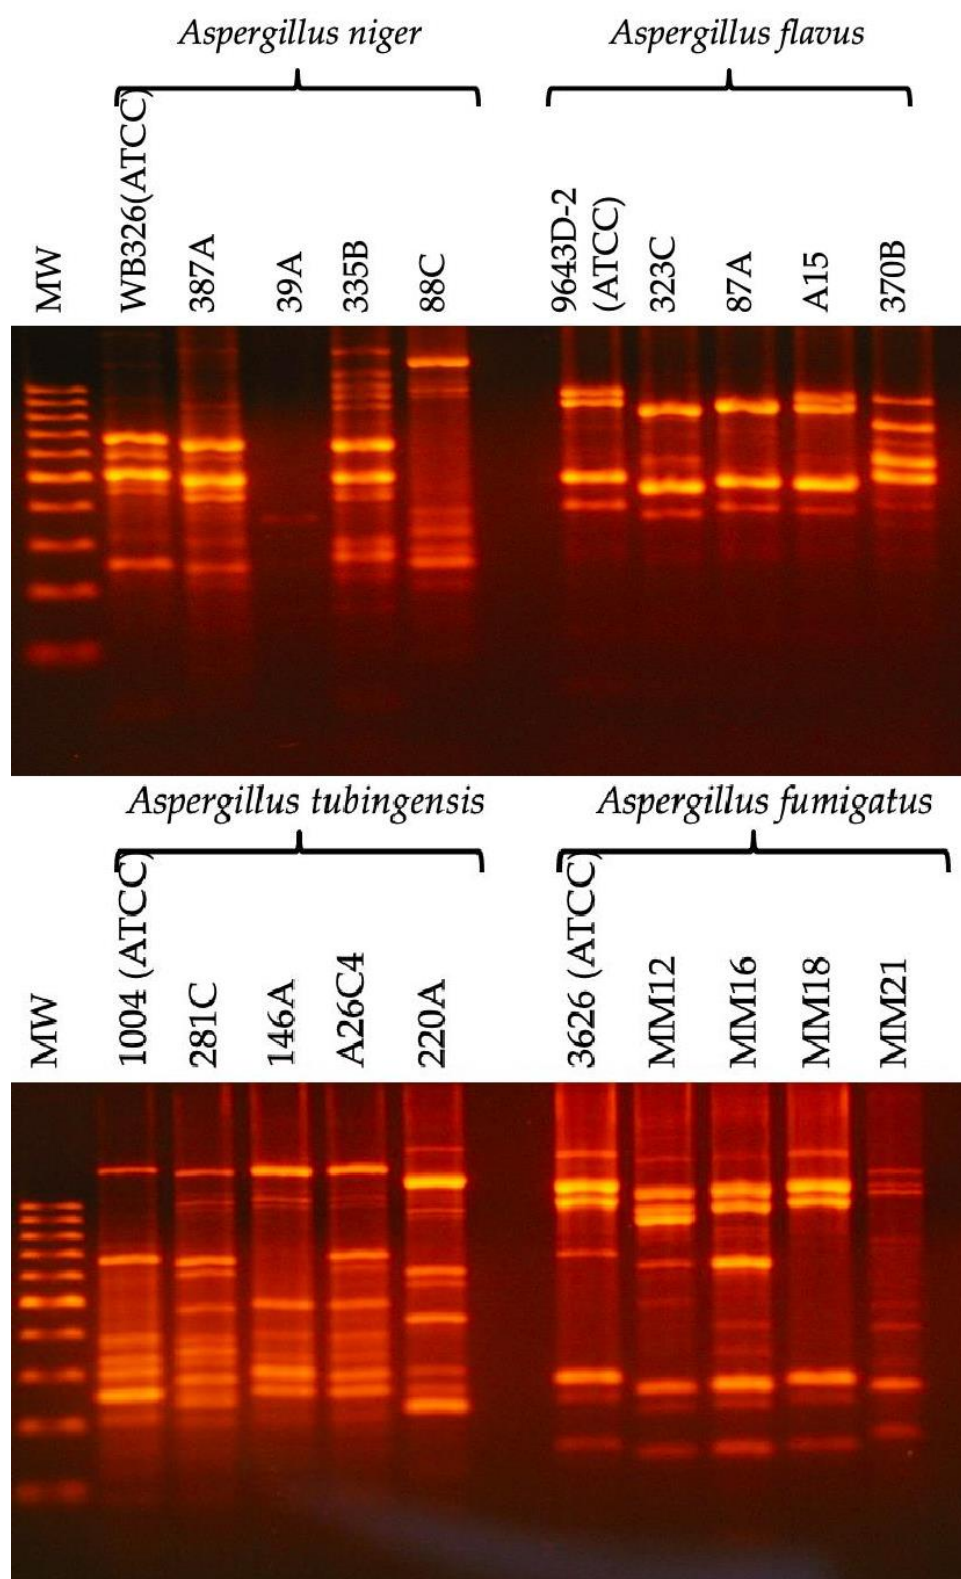

**Figure 21.** Polymorphic patterns obtained by RAPD-PCR for the four species with oligonucleotide OPC-07.

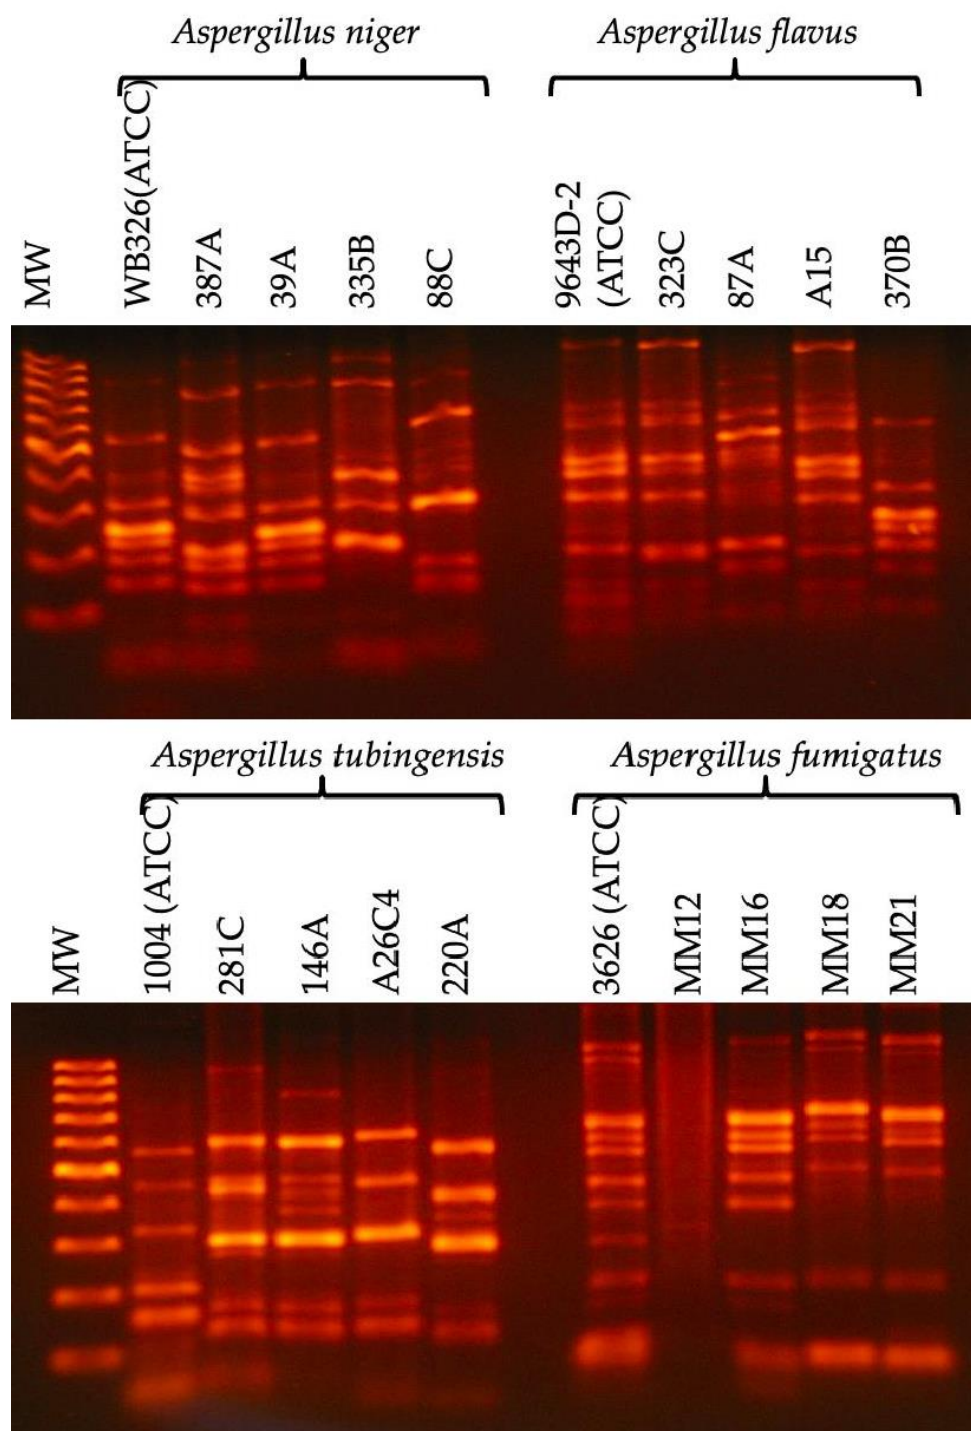

**Figure 22.** Polymorphic patterns obtained by RAPD-PCR for the four species with oligonucleotide OPG-01.

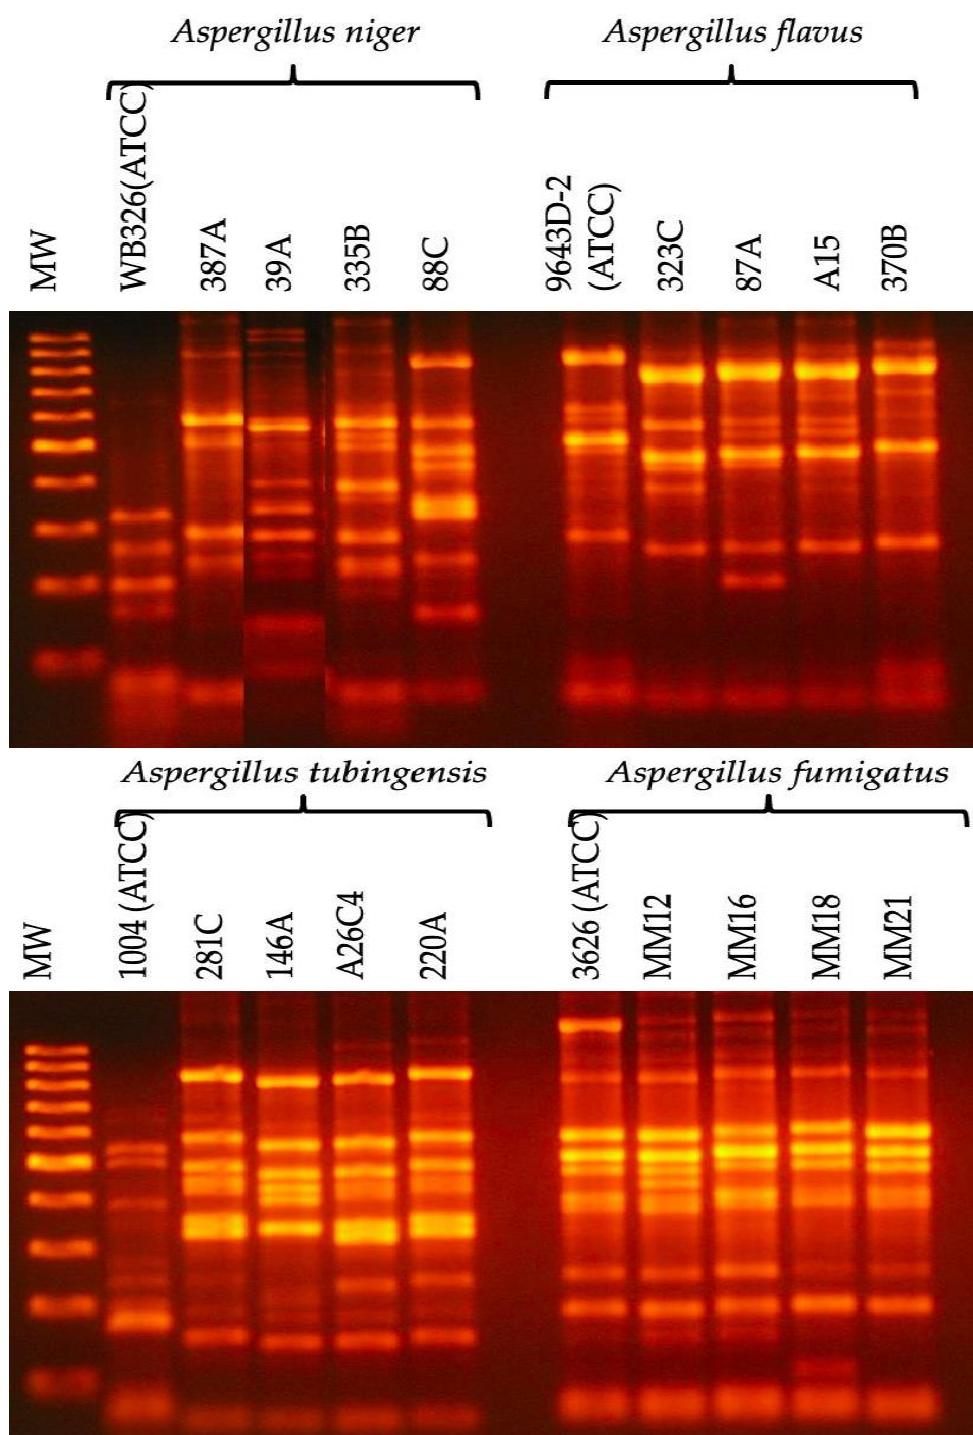

**Figure 23.** Polymorphic patterns obtained by RAPD-PCR for the four species with oligonucleotide OPG-03.



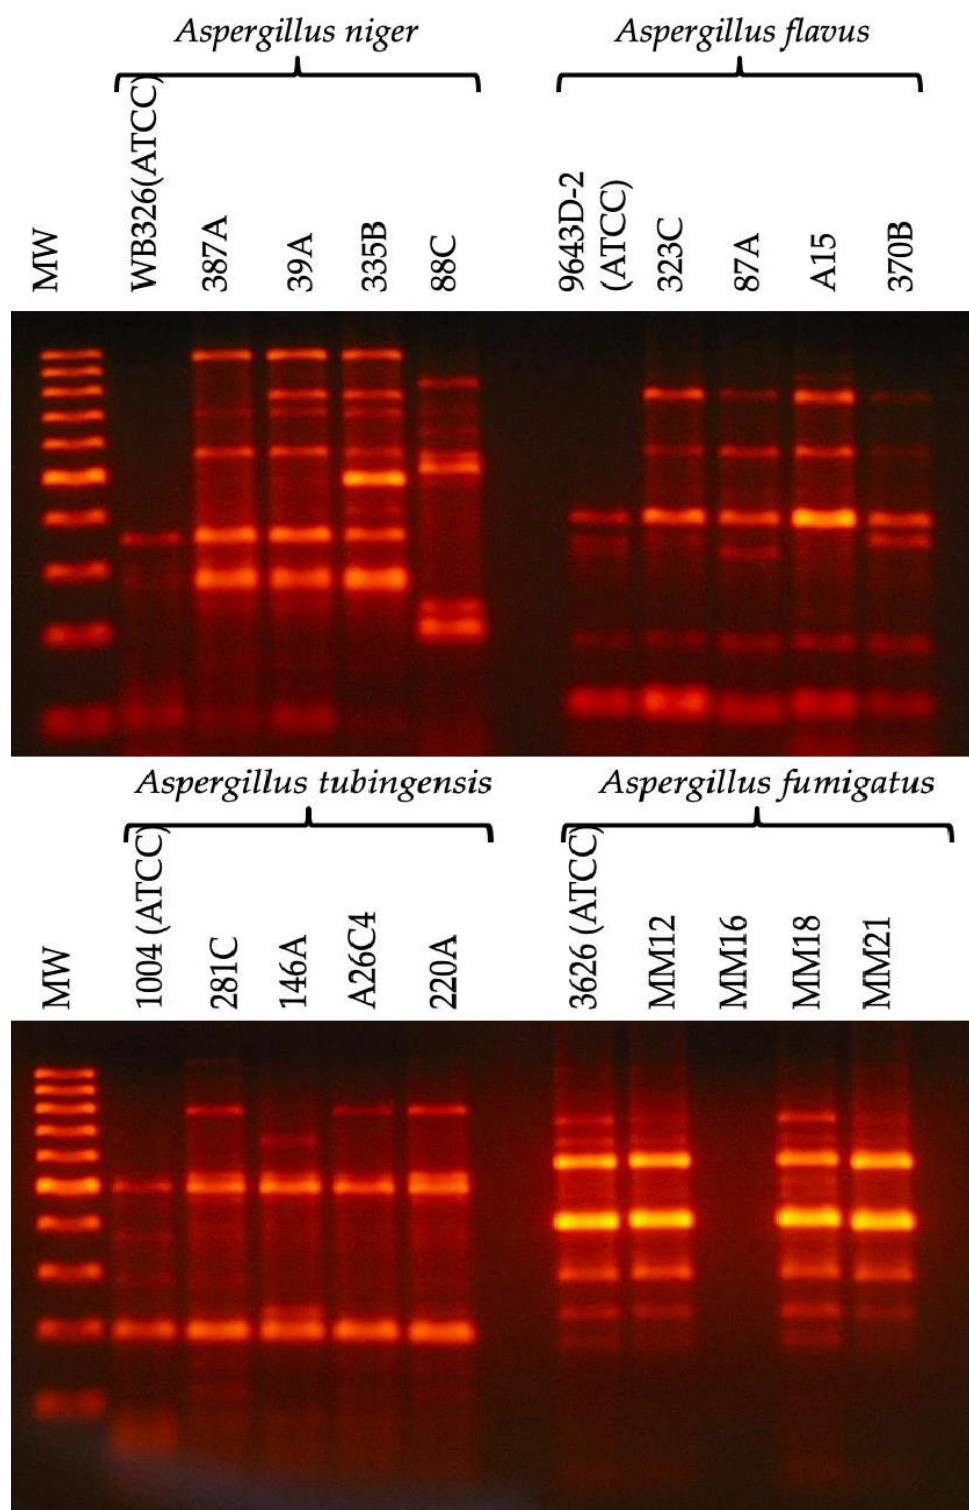

**Figure 24.** Polymorphic patterns obtained by RAPD-PCR for the four species with oligonucleotide OPG-13.



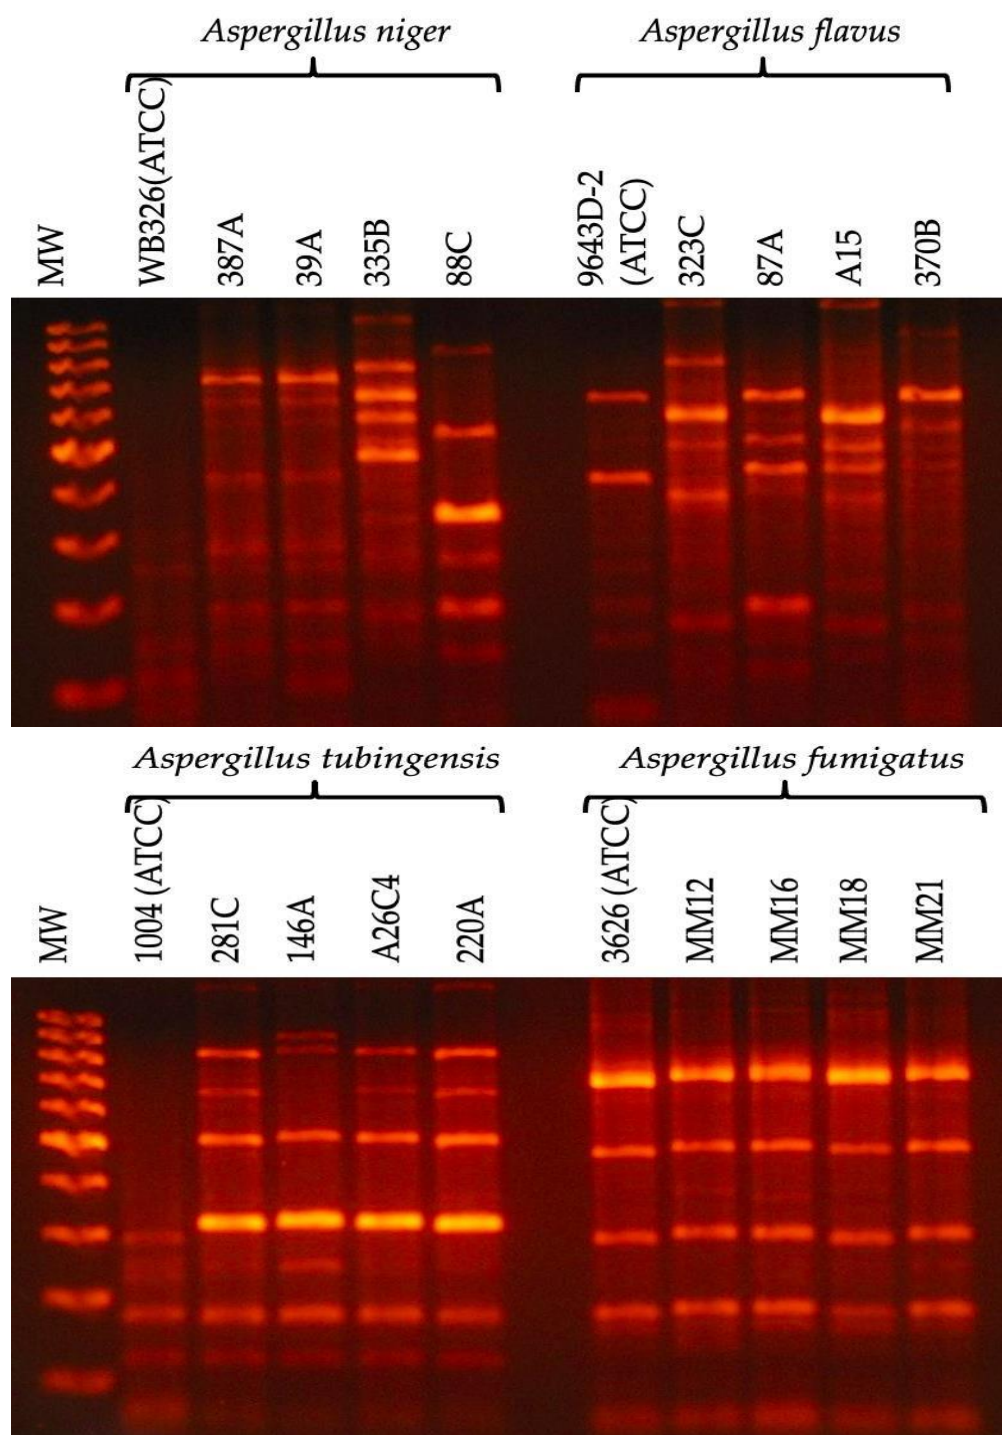

**Figure 25.** Polymorphic patterns obtained by RAPD-PCR for the four species with oligonucleotide OPG-15.

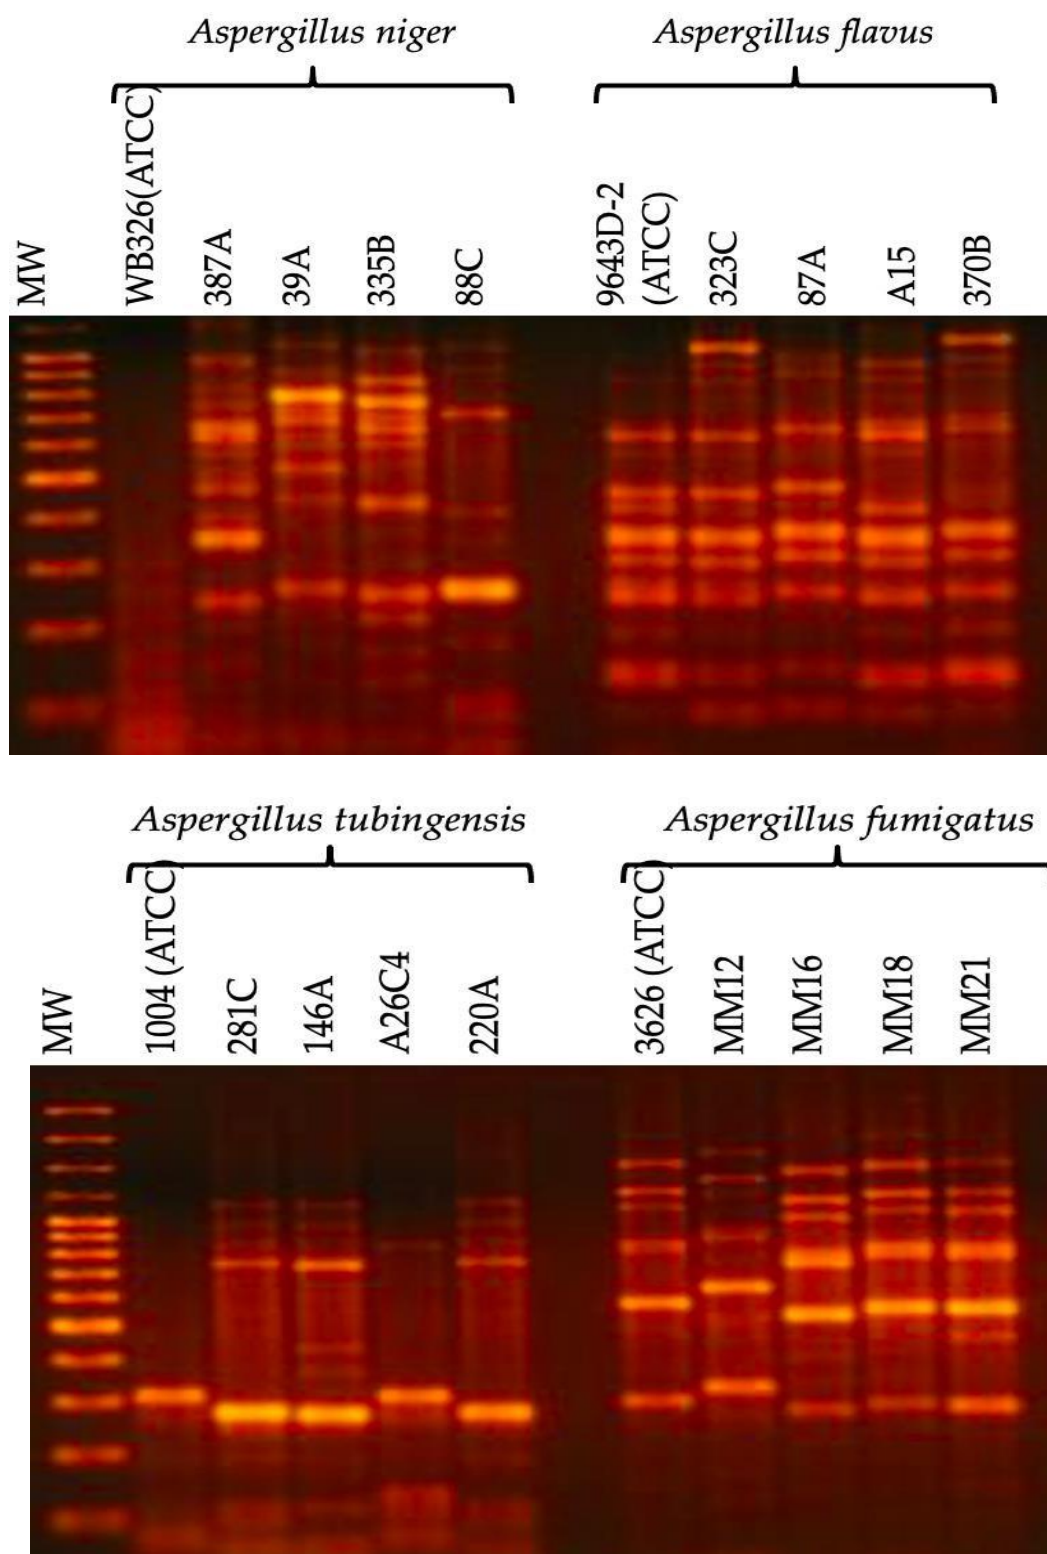

**Figure 26.** Polymorphic patterns obtained by RAPD-PCR for the four species with oligonucleotide OPC-06.

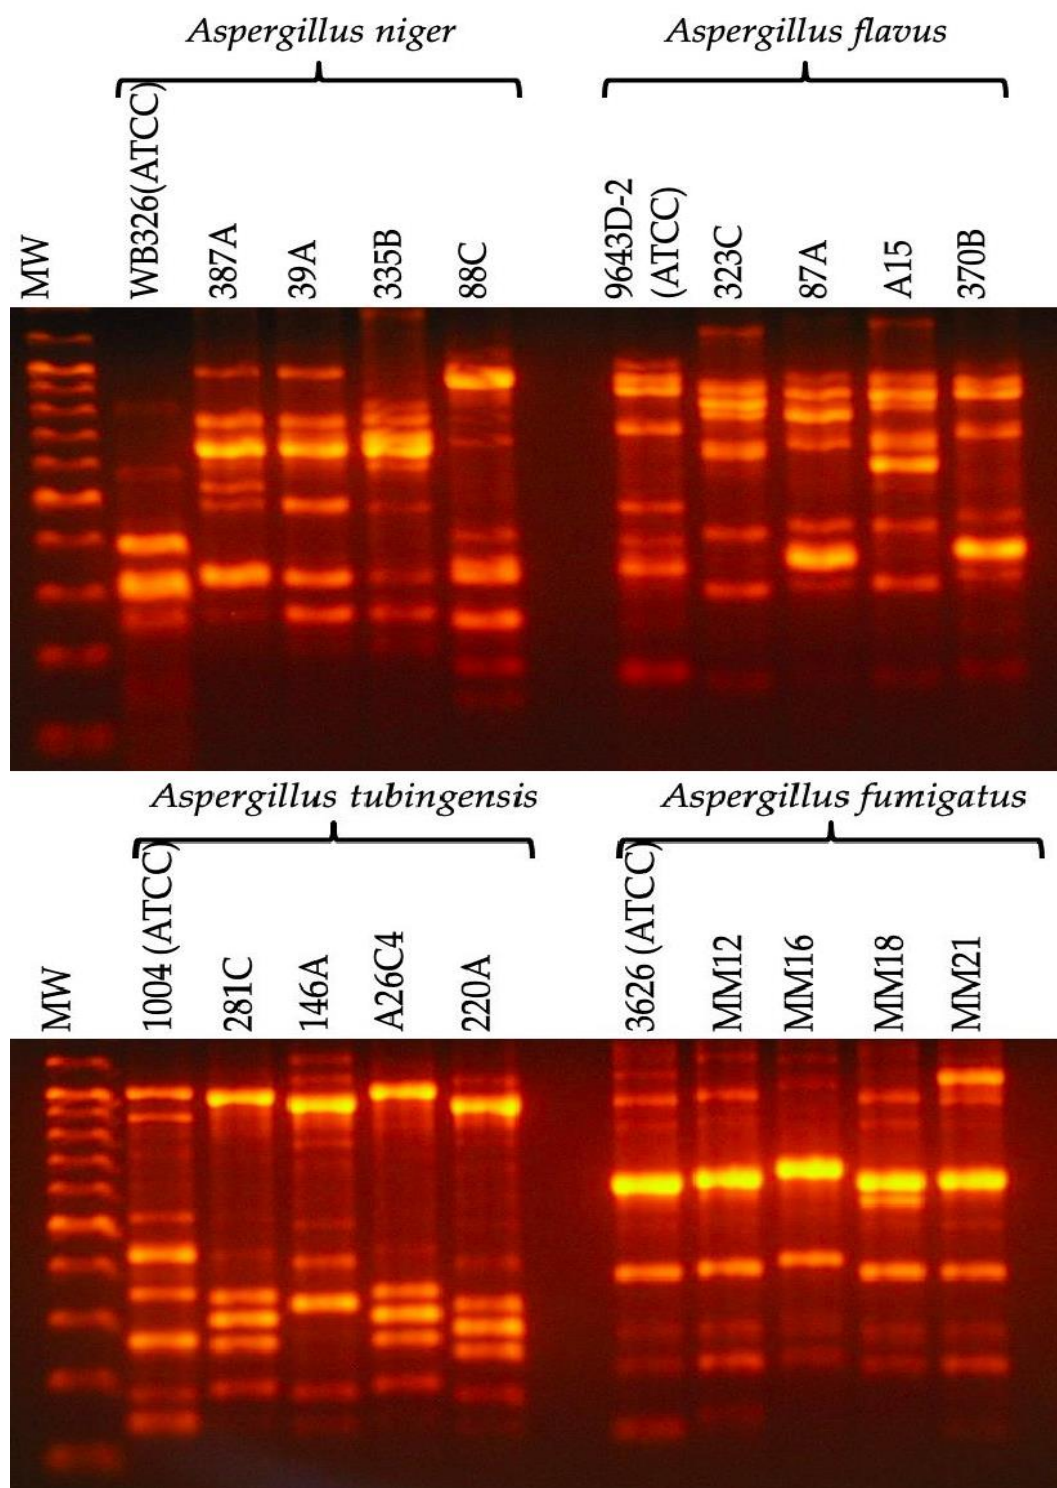

**Figure 27.** Polymorphic patterns obtained by RAPD-PCR for the four species with oligonucleotide OPG-05.



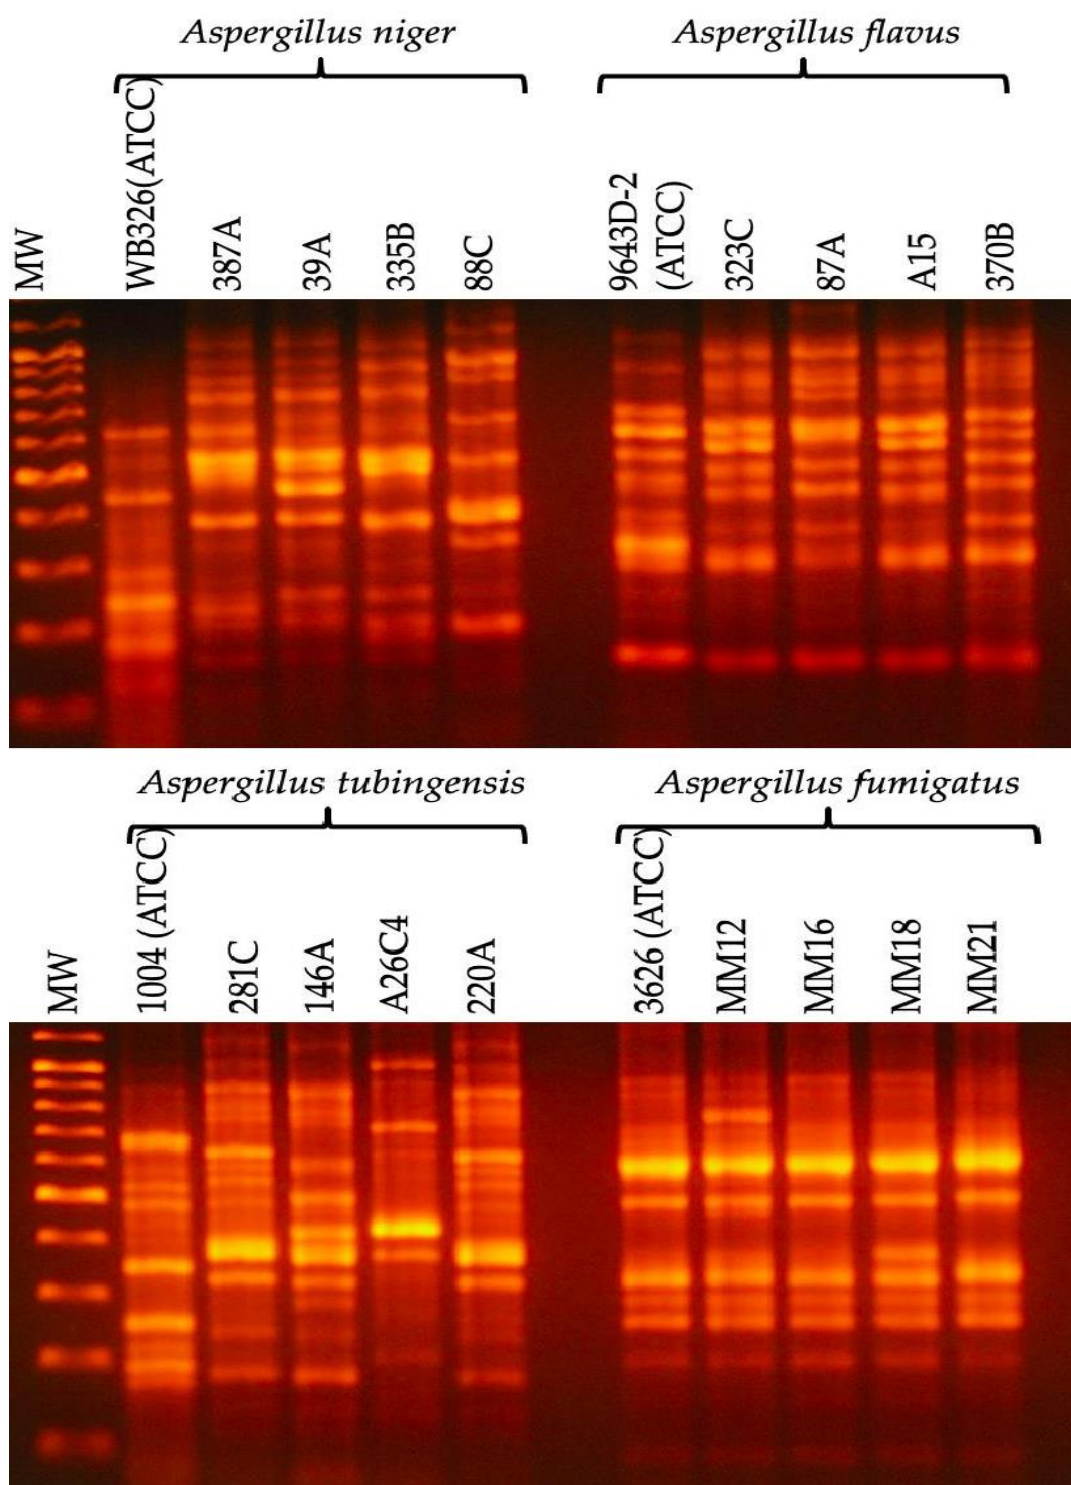

**Figure 28.** Polymorphic patterns obtained by RAPD-PCR for the four species with oligonucleotide OPM-12.



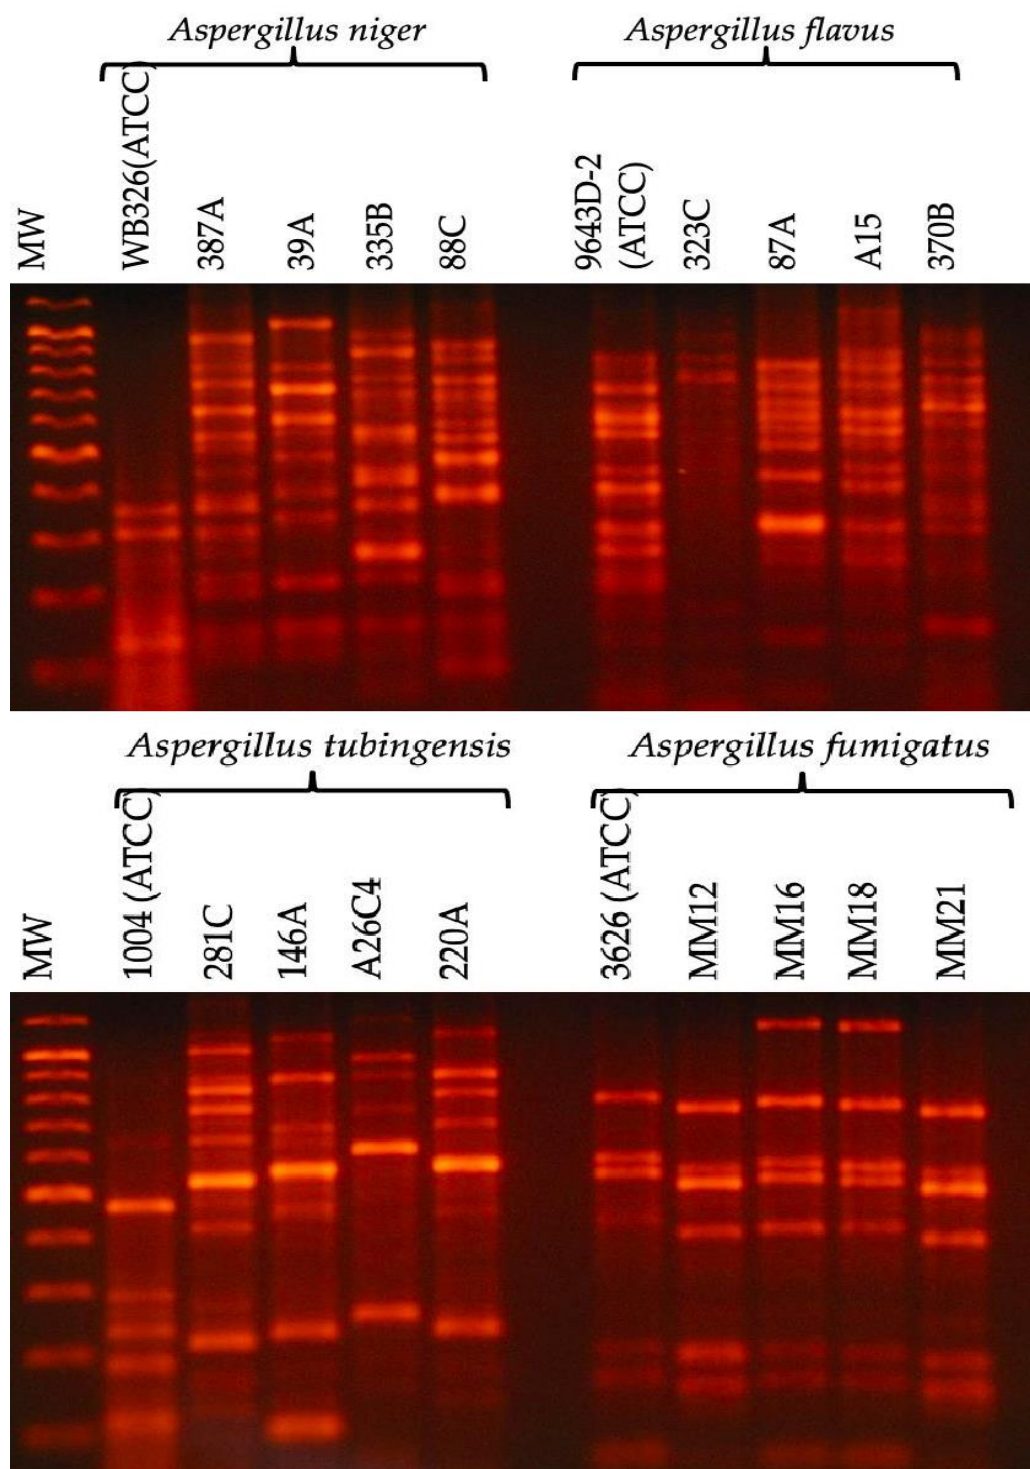

**Figure 29.** Polymorphic patterns obtained by RAPD-PCR for the four species with oligonucleotide OPH-03.

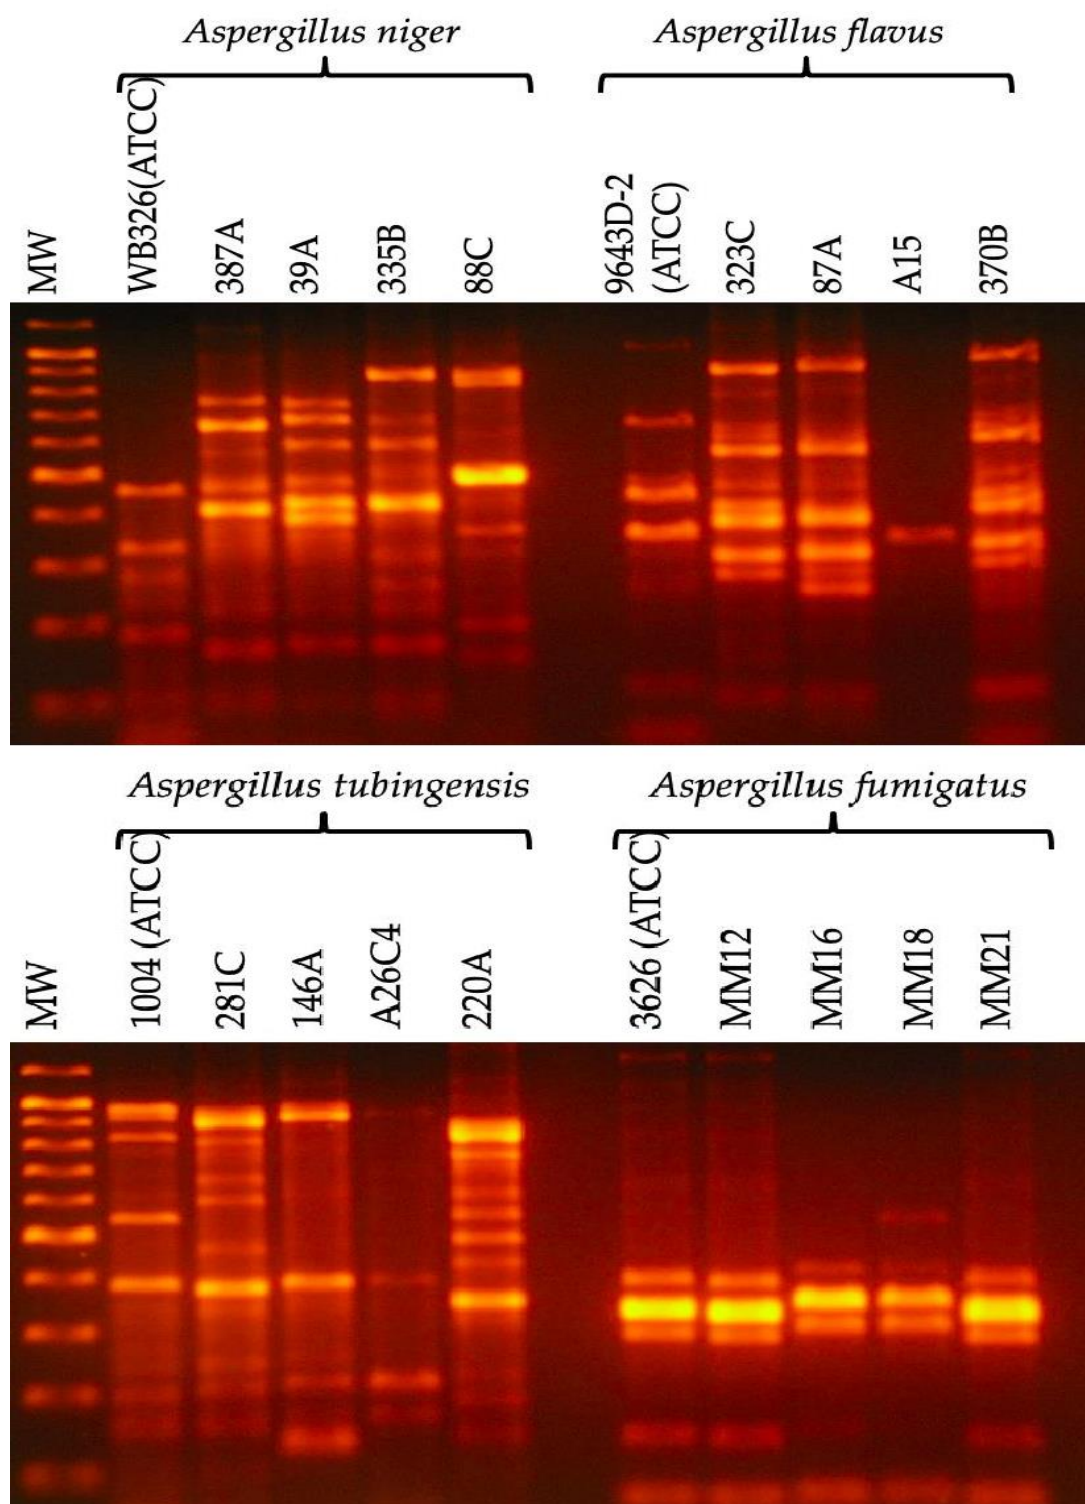

**Figure 30.** Polymorphic patterns obtained by RAPD-PCR for the four species with oligonucleotide OPG-07.

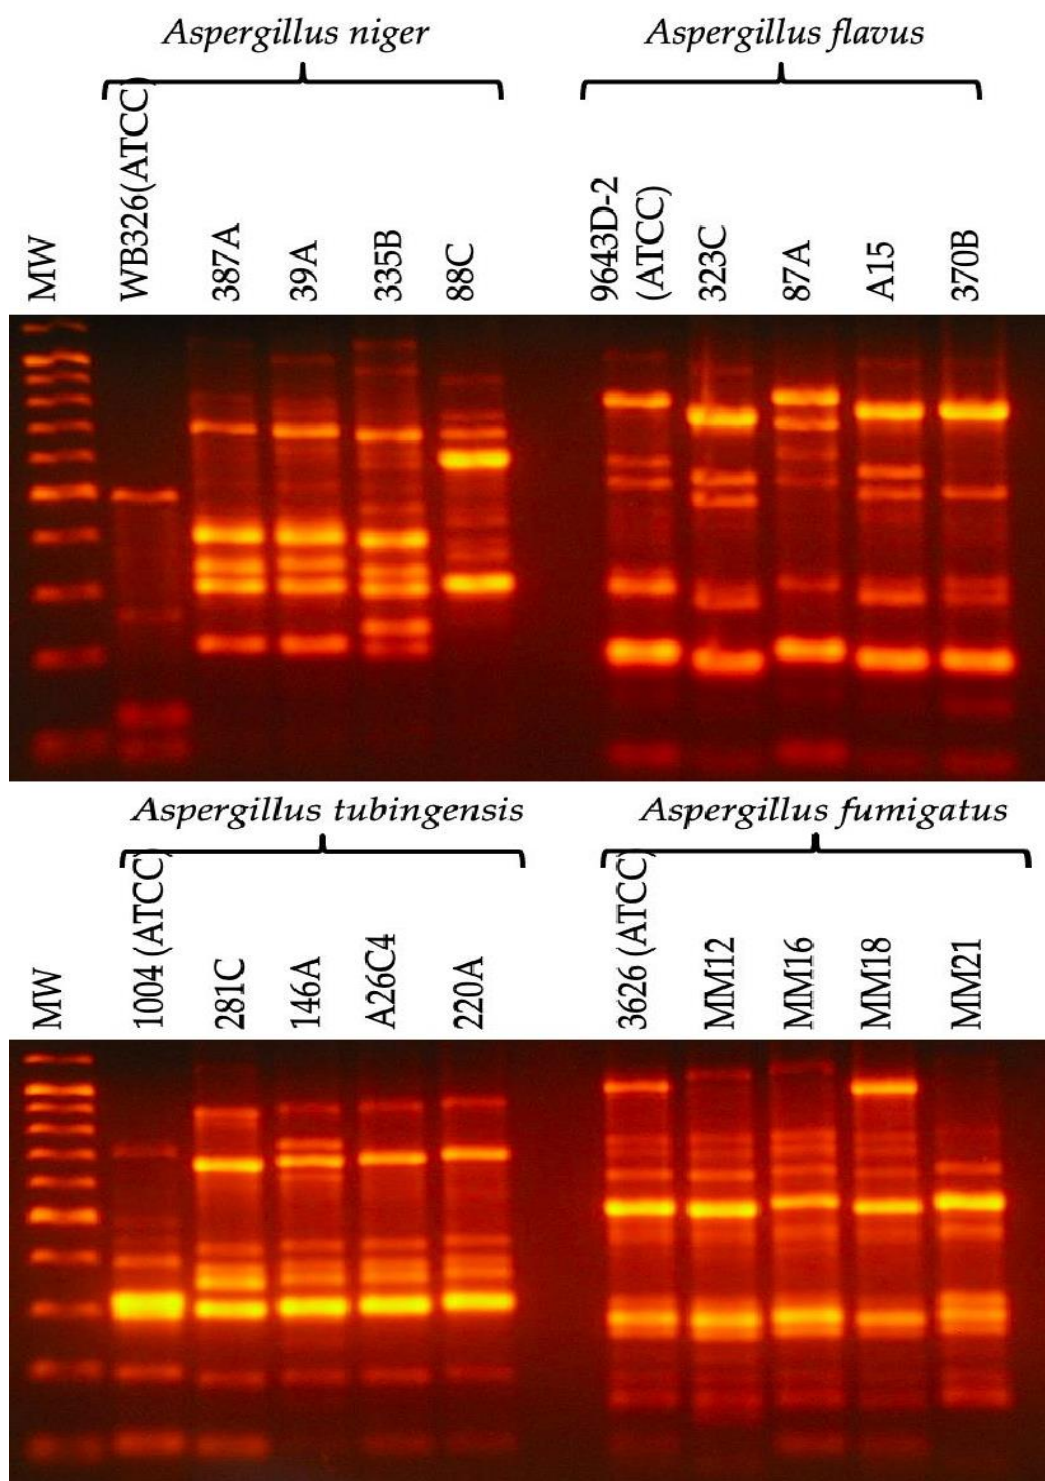

**Figure 31.** Polymorphic patterns obtained by RAPD-PCR for the four species with oligonucleotide OPH-18.



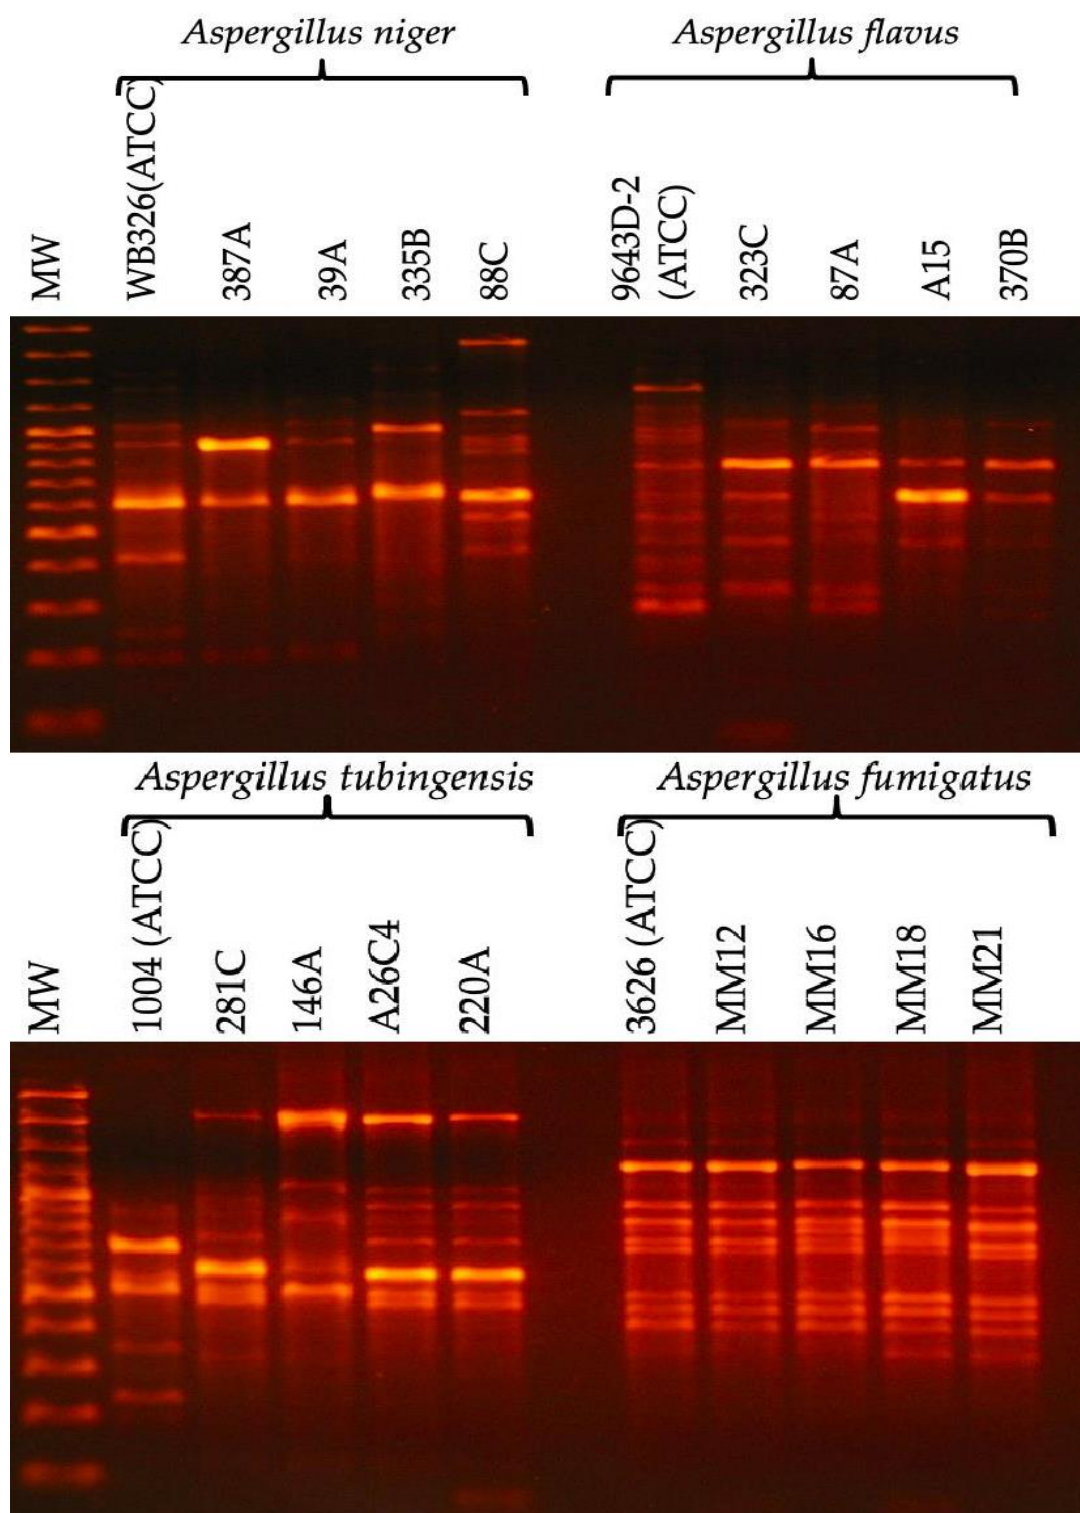

**Figure 32.** Polymorphic patterns obtained by RAPD-PCR for the four species with oligonucleotide OPF-01.



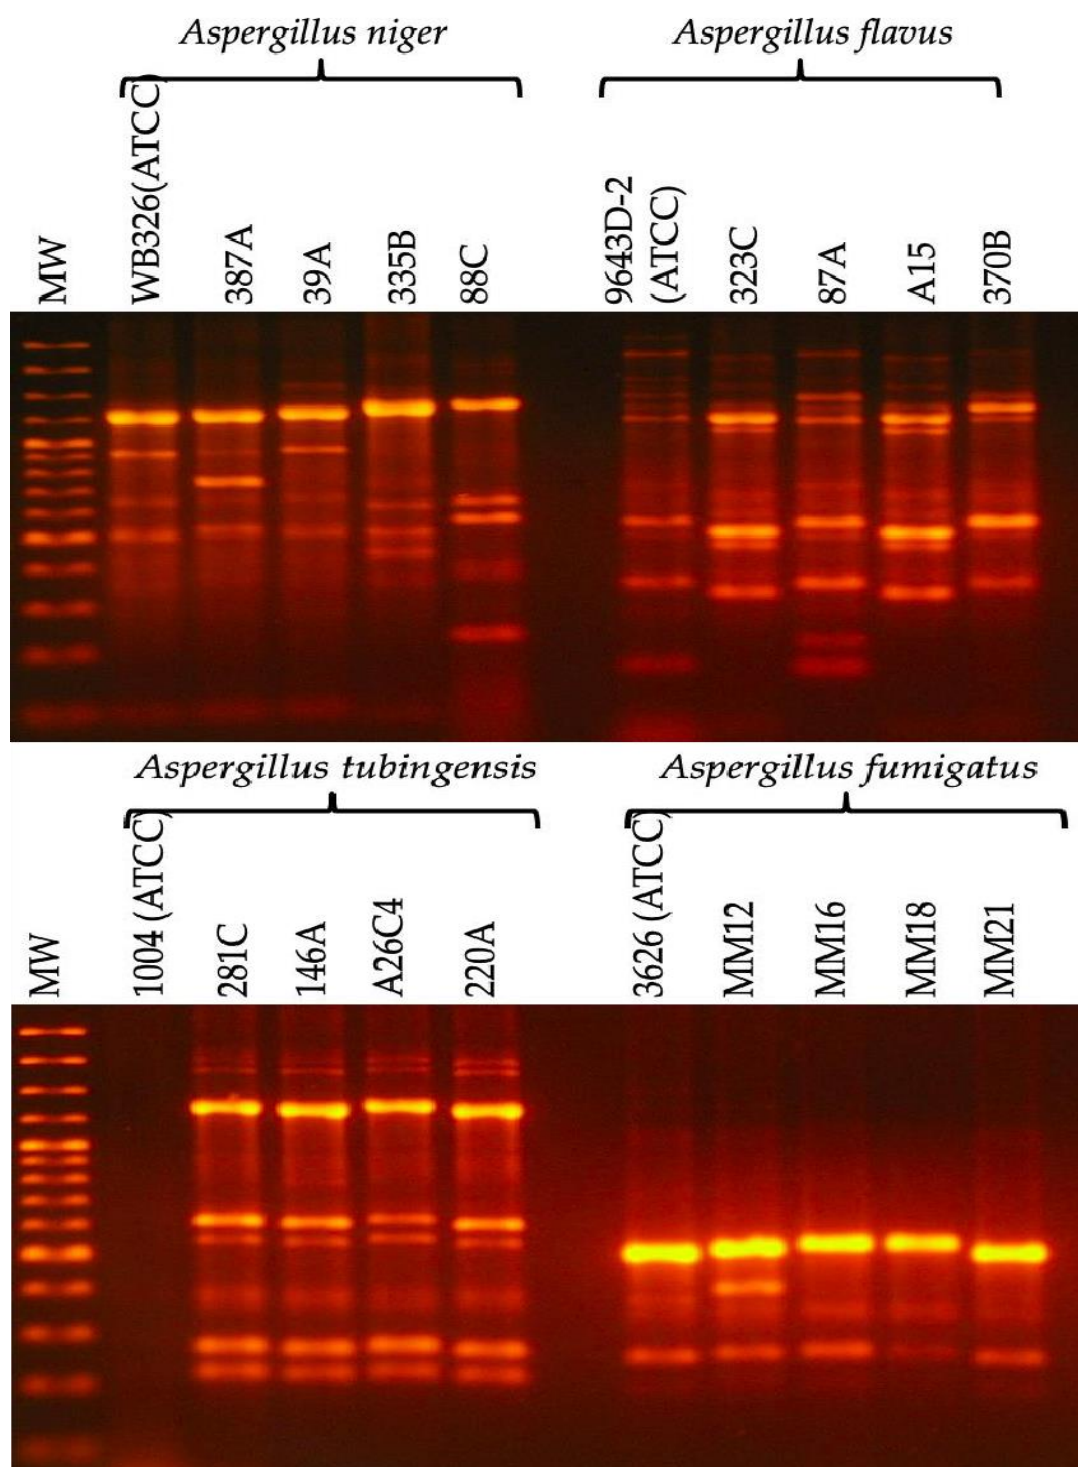

**Figure 33.** Polymorphic patterns obtained by RAPD-PCR for the four species with oligonucleotide OPF-07.

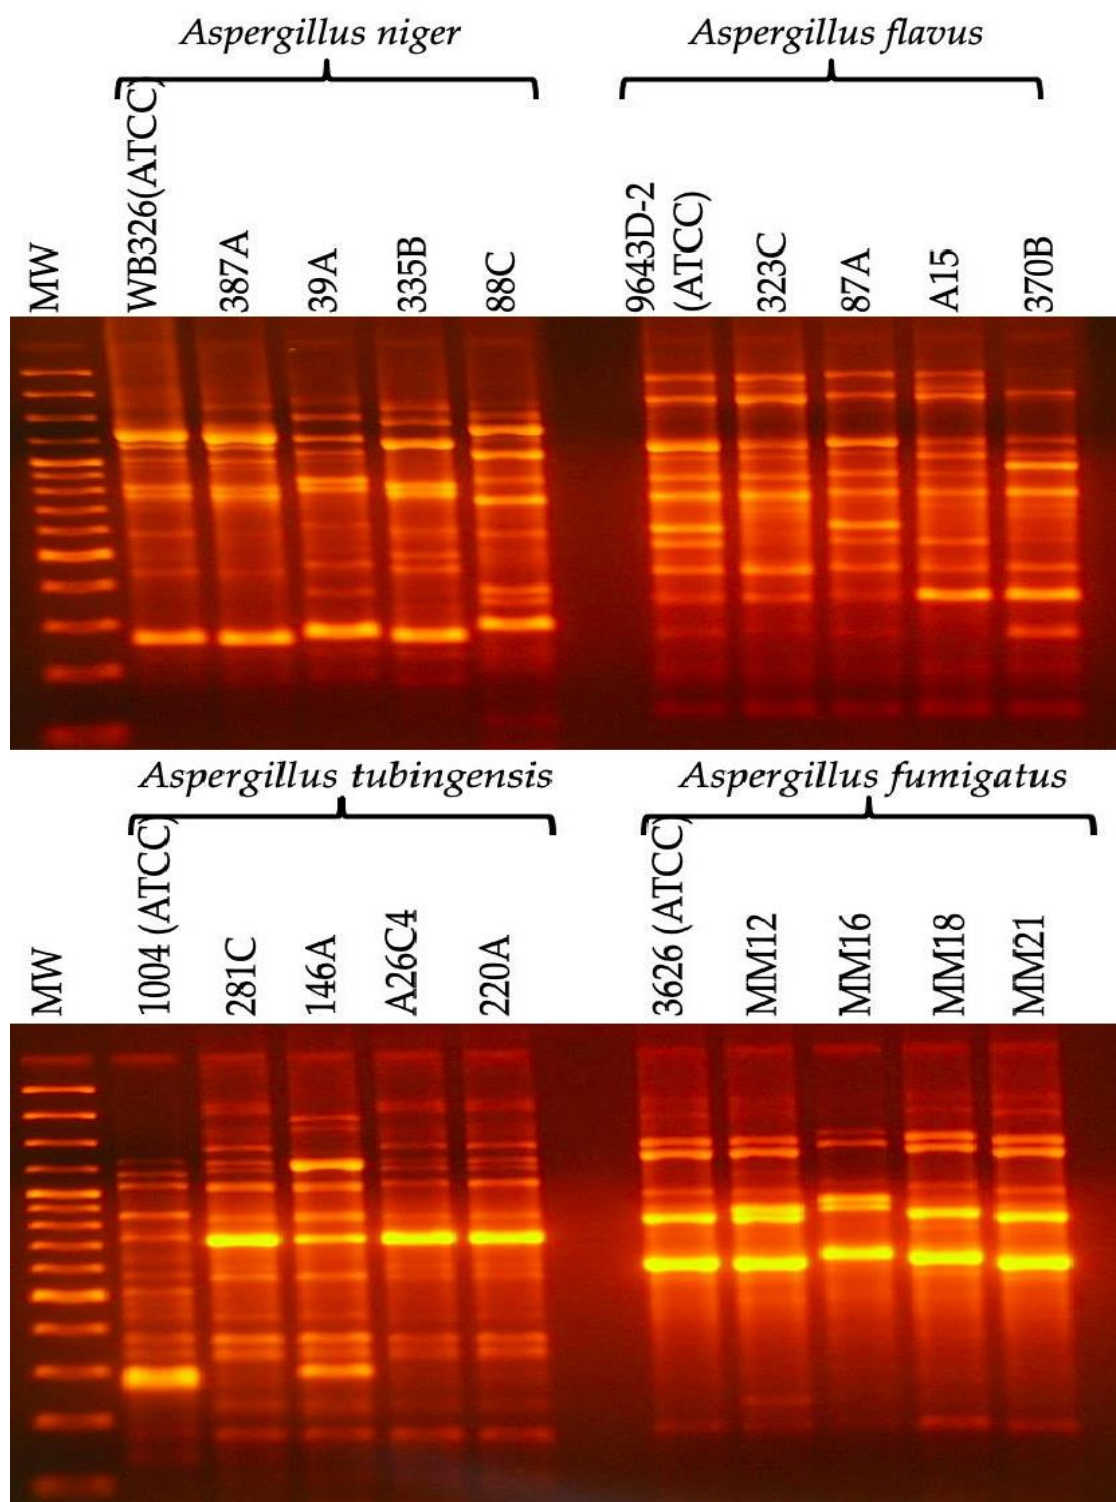

**Figure 34.** Polymorphic patterns obtained by RAPD-PCR for the four species with oligonucleotide OPF-09.

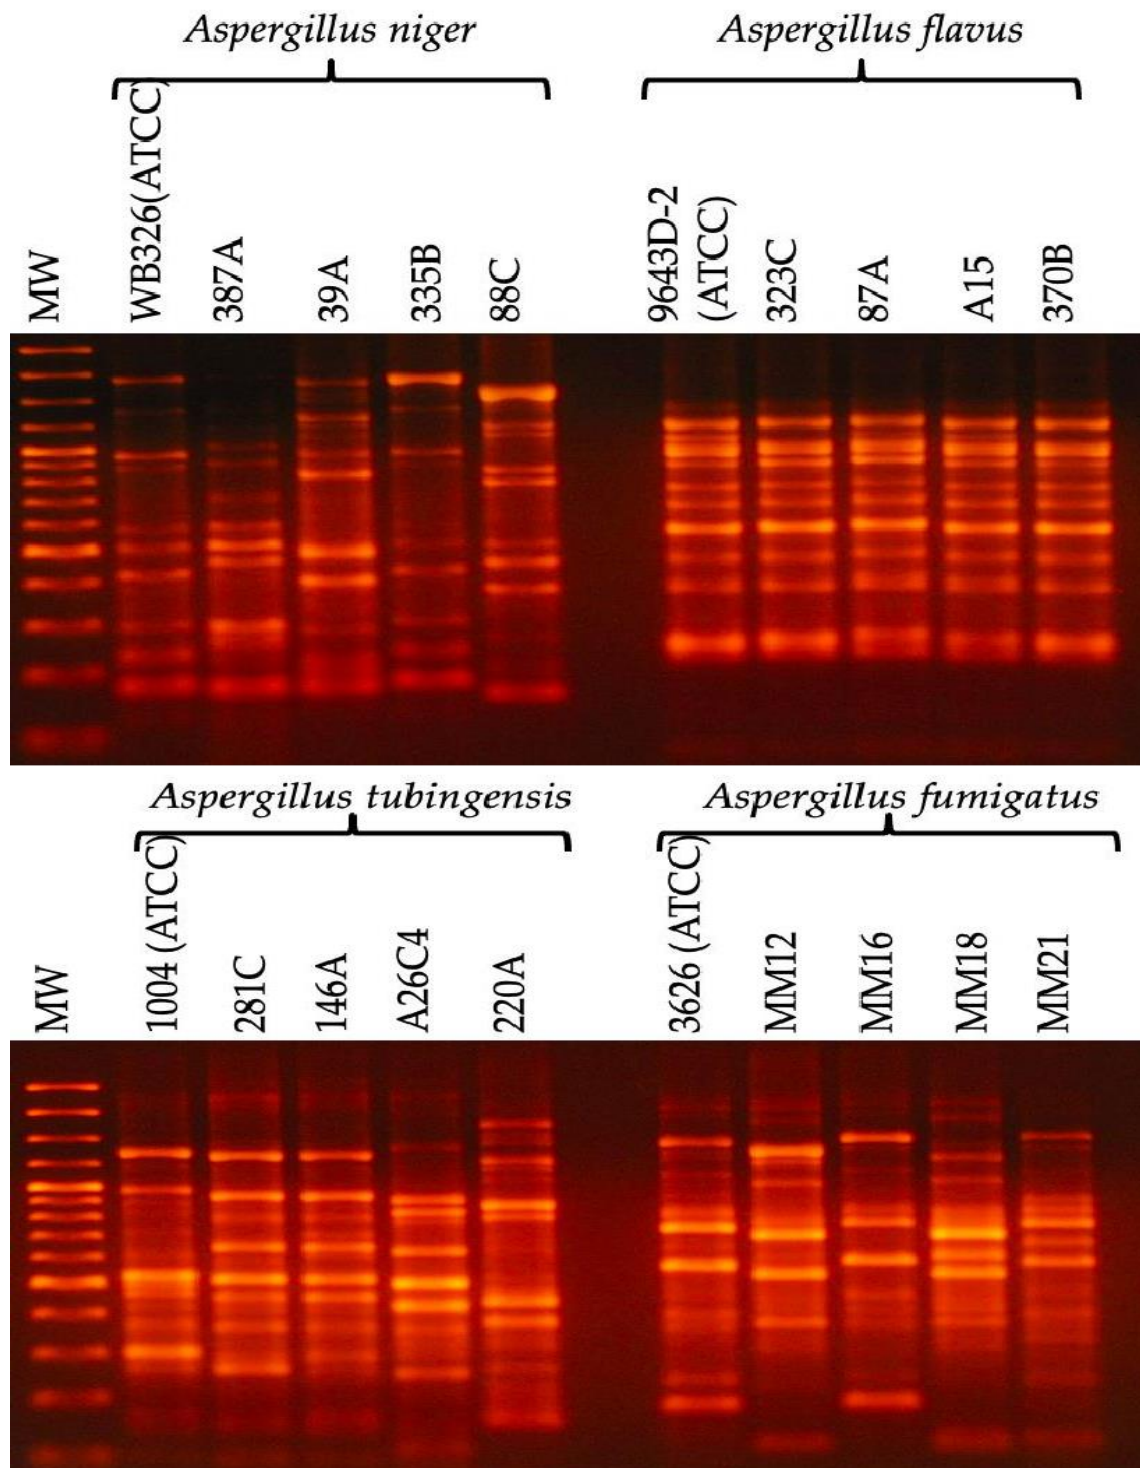

**Figure 35.** Polymorphic patterns obtained by RAPD-PCR for the four species with oligonucleotide OPE-02.



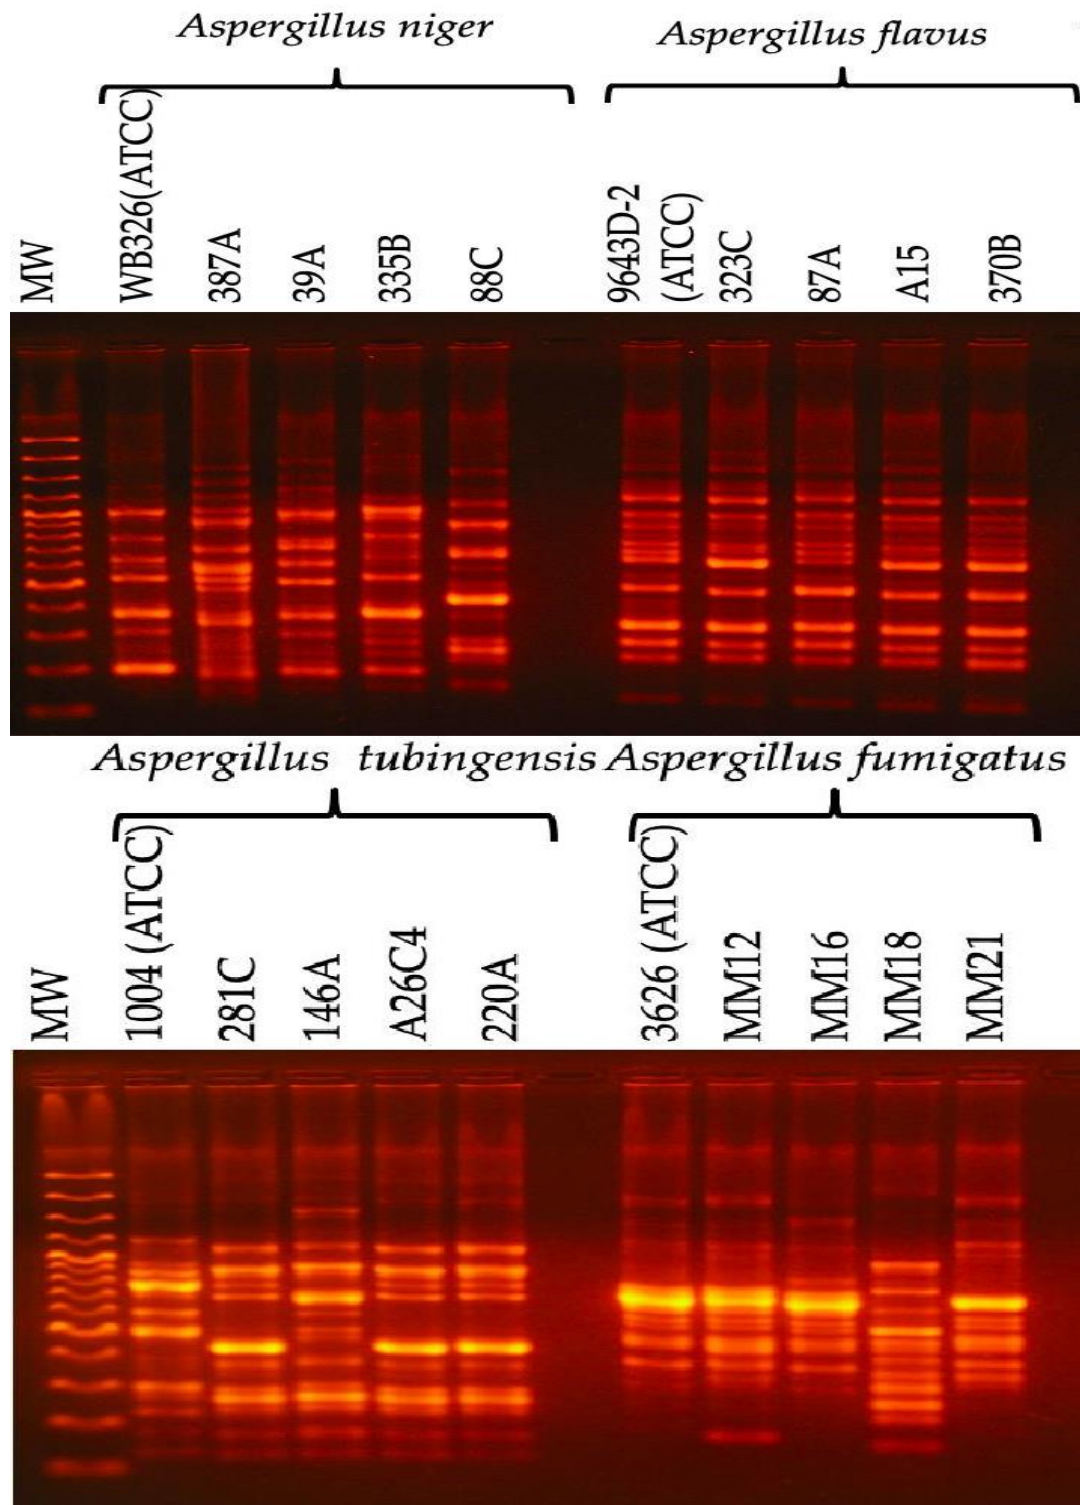

**Figure 36.** Polymorphic patterns obtained by RAPD-PCR for the four species with oligonucleotide P54.



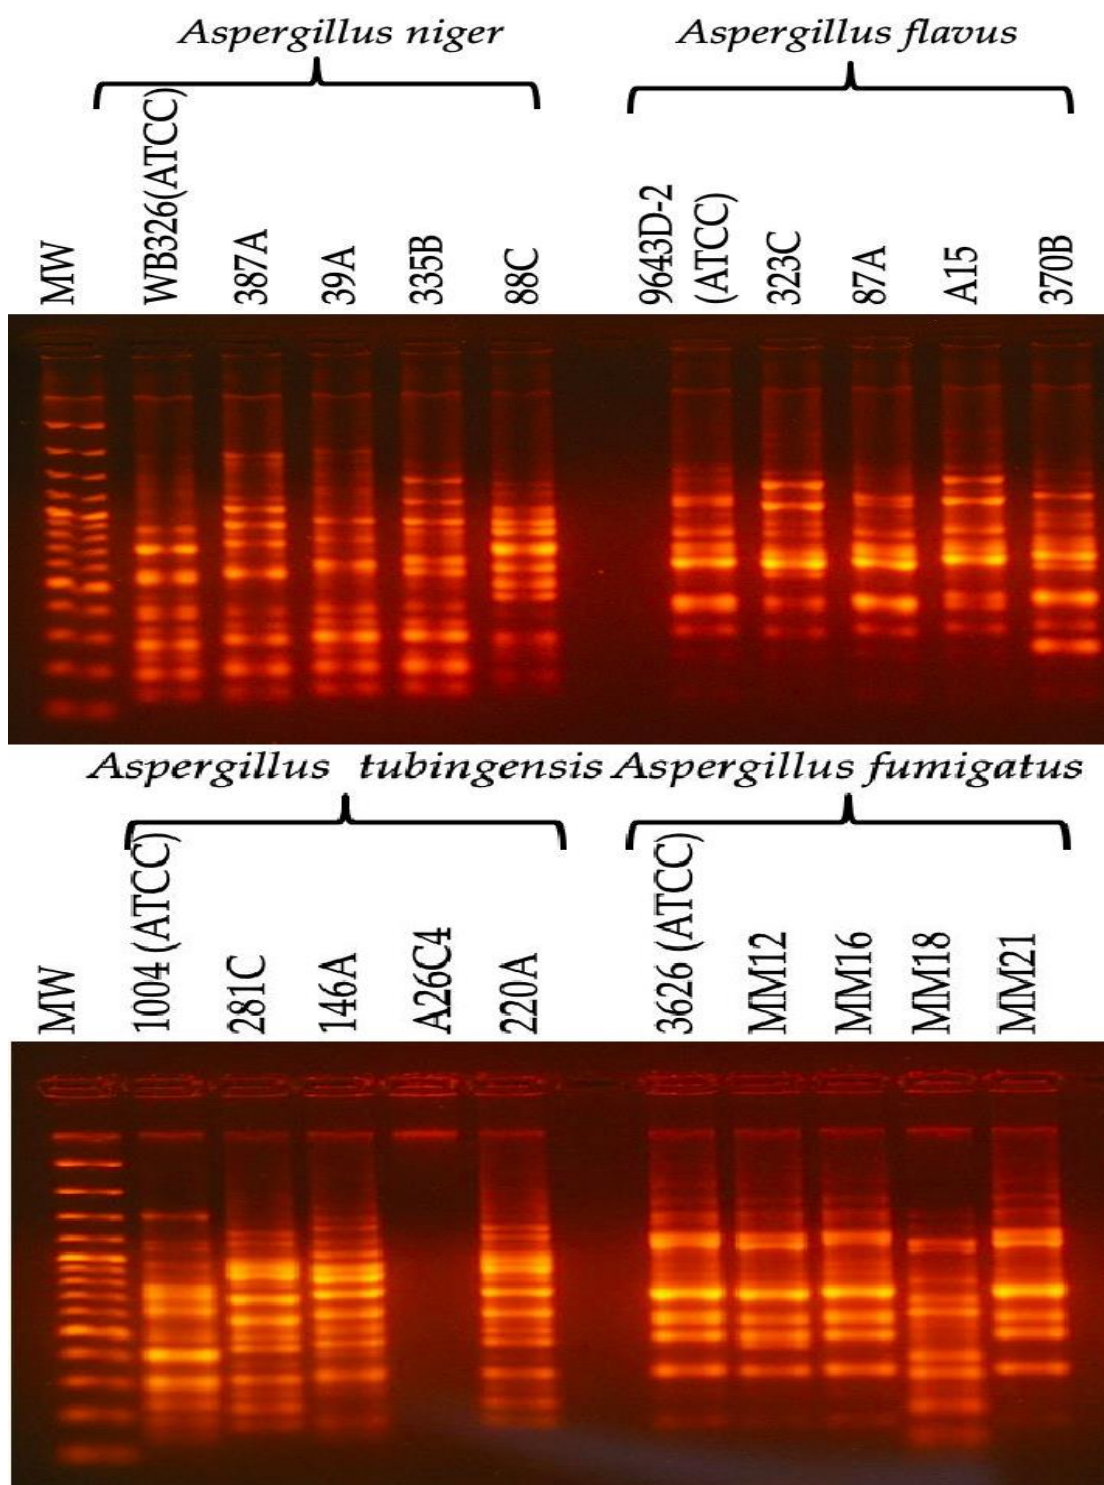

**Figure 37.** Polymorphic patterns obtained by RAPD-PCR for the four species with oligonucleotide P160.

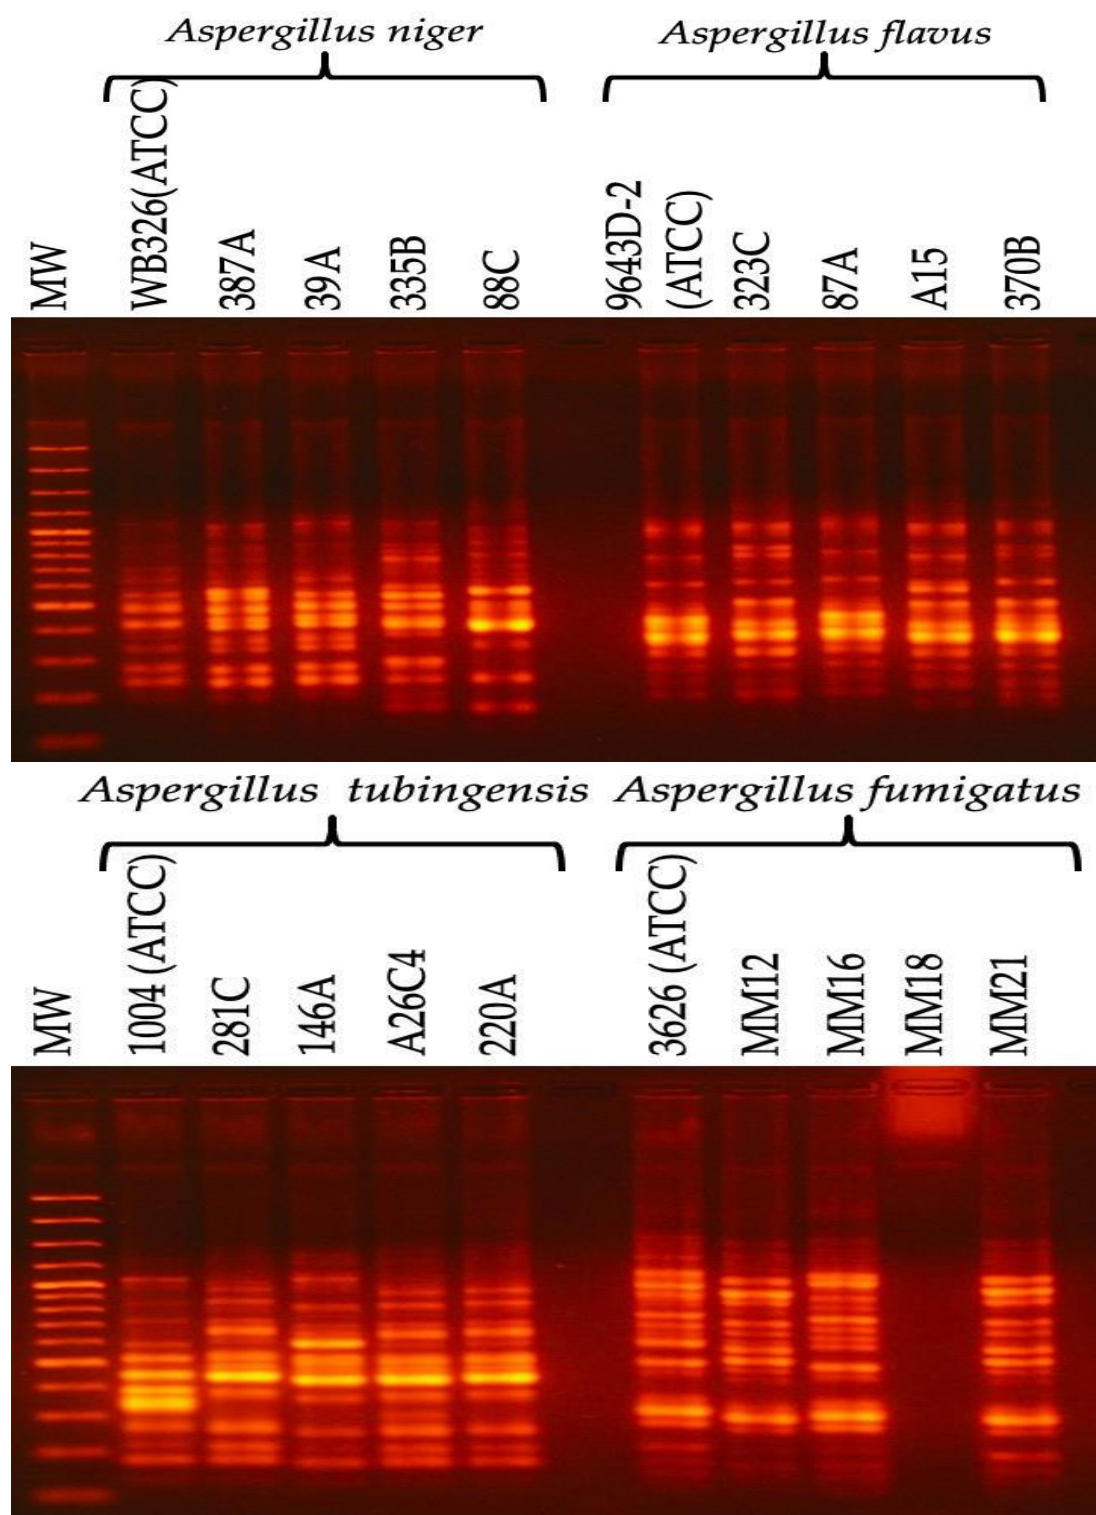

**Figure 38.** Polymorphic patterns obtained by RAPD-PCR for the four species with oligonucleotide PELF.

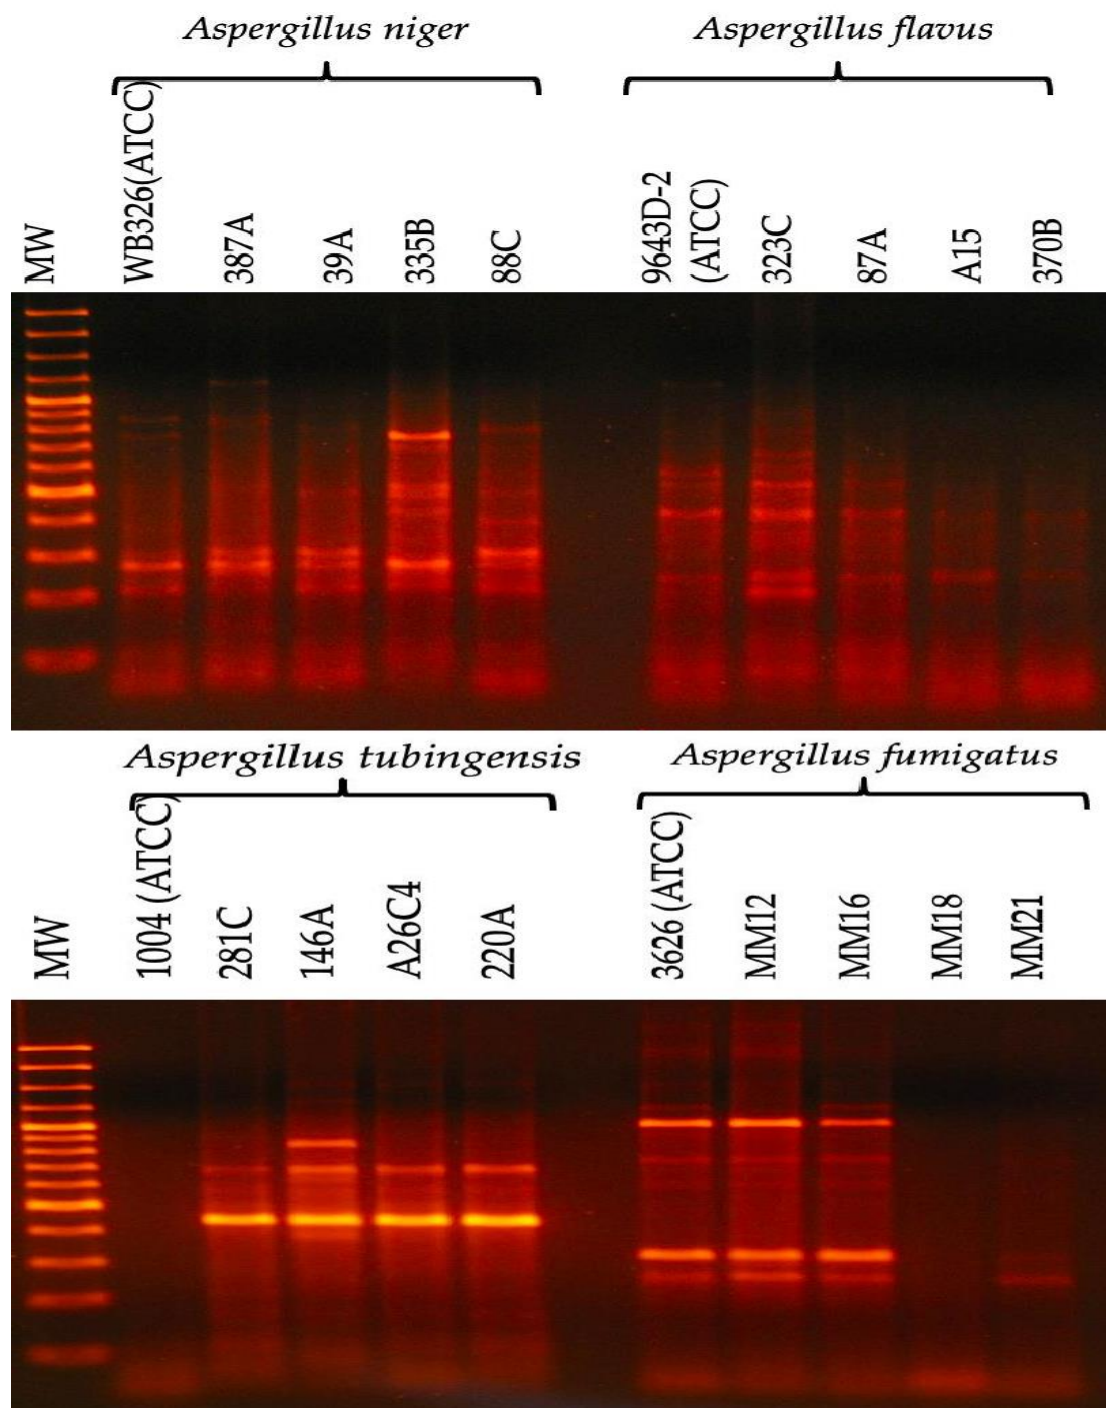

**Figure 39.** Polymorphic patterns obtained by RAPD-PCR for the four species with oligonucleotide B04.



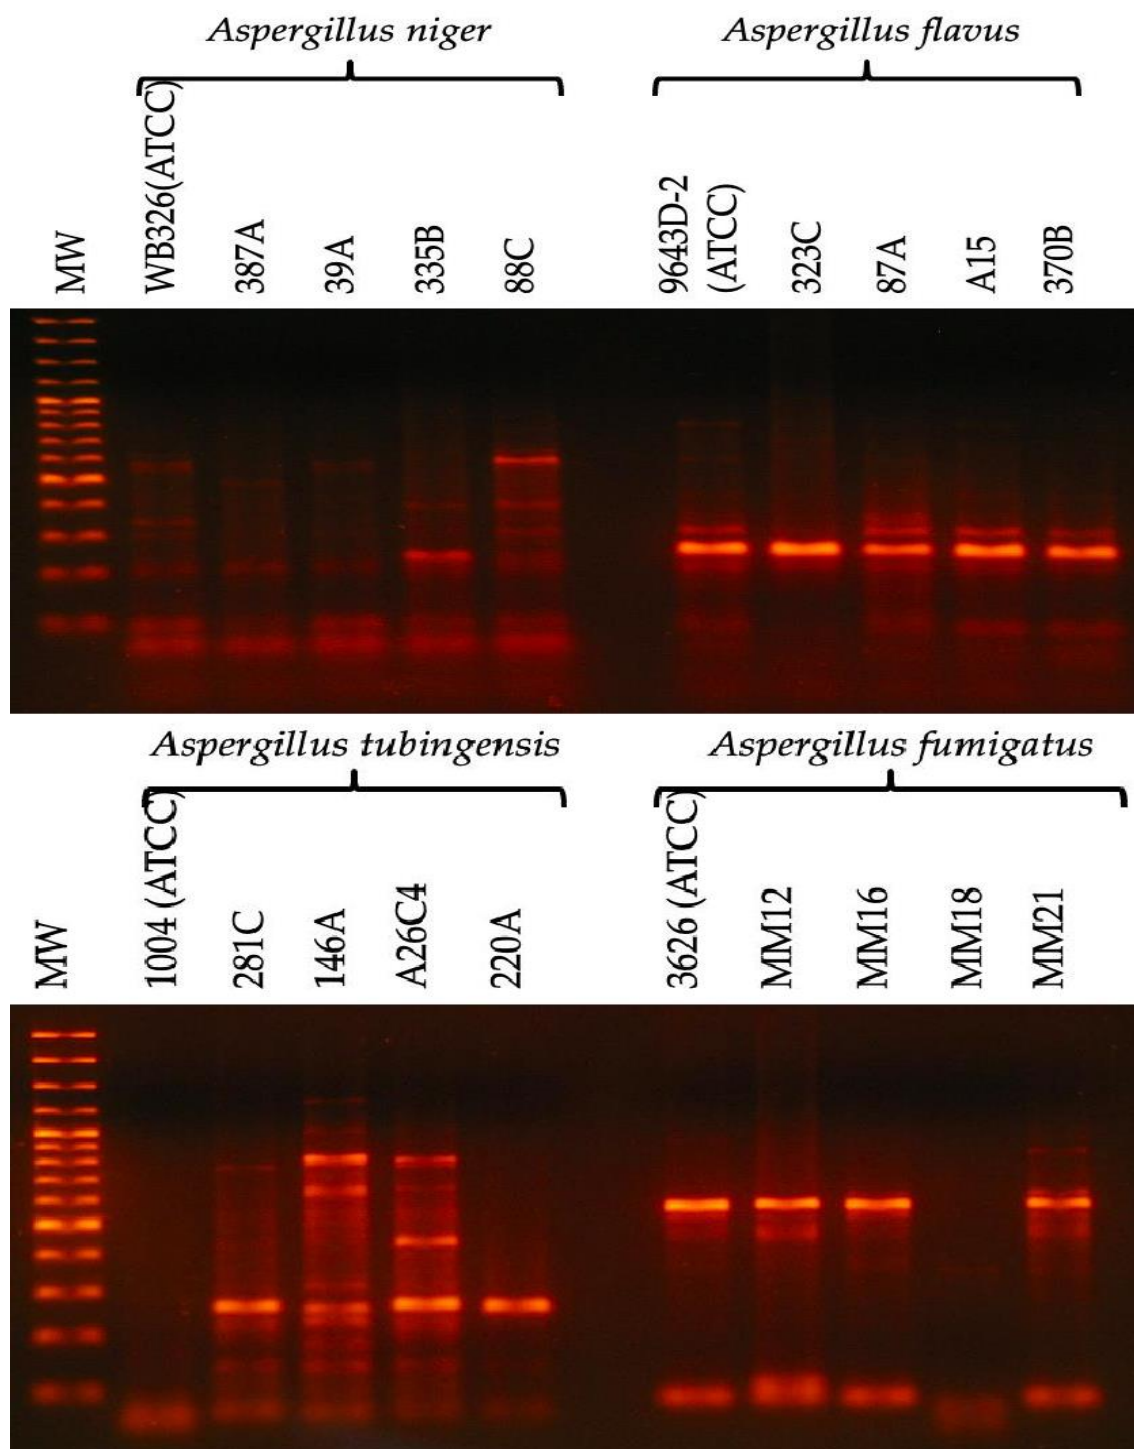

**Figure 40.** Polymorphic patterns obtained by RAPD-PCR for the four species with oligonucleotide OPH-17.



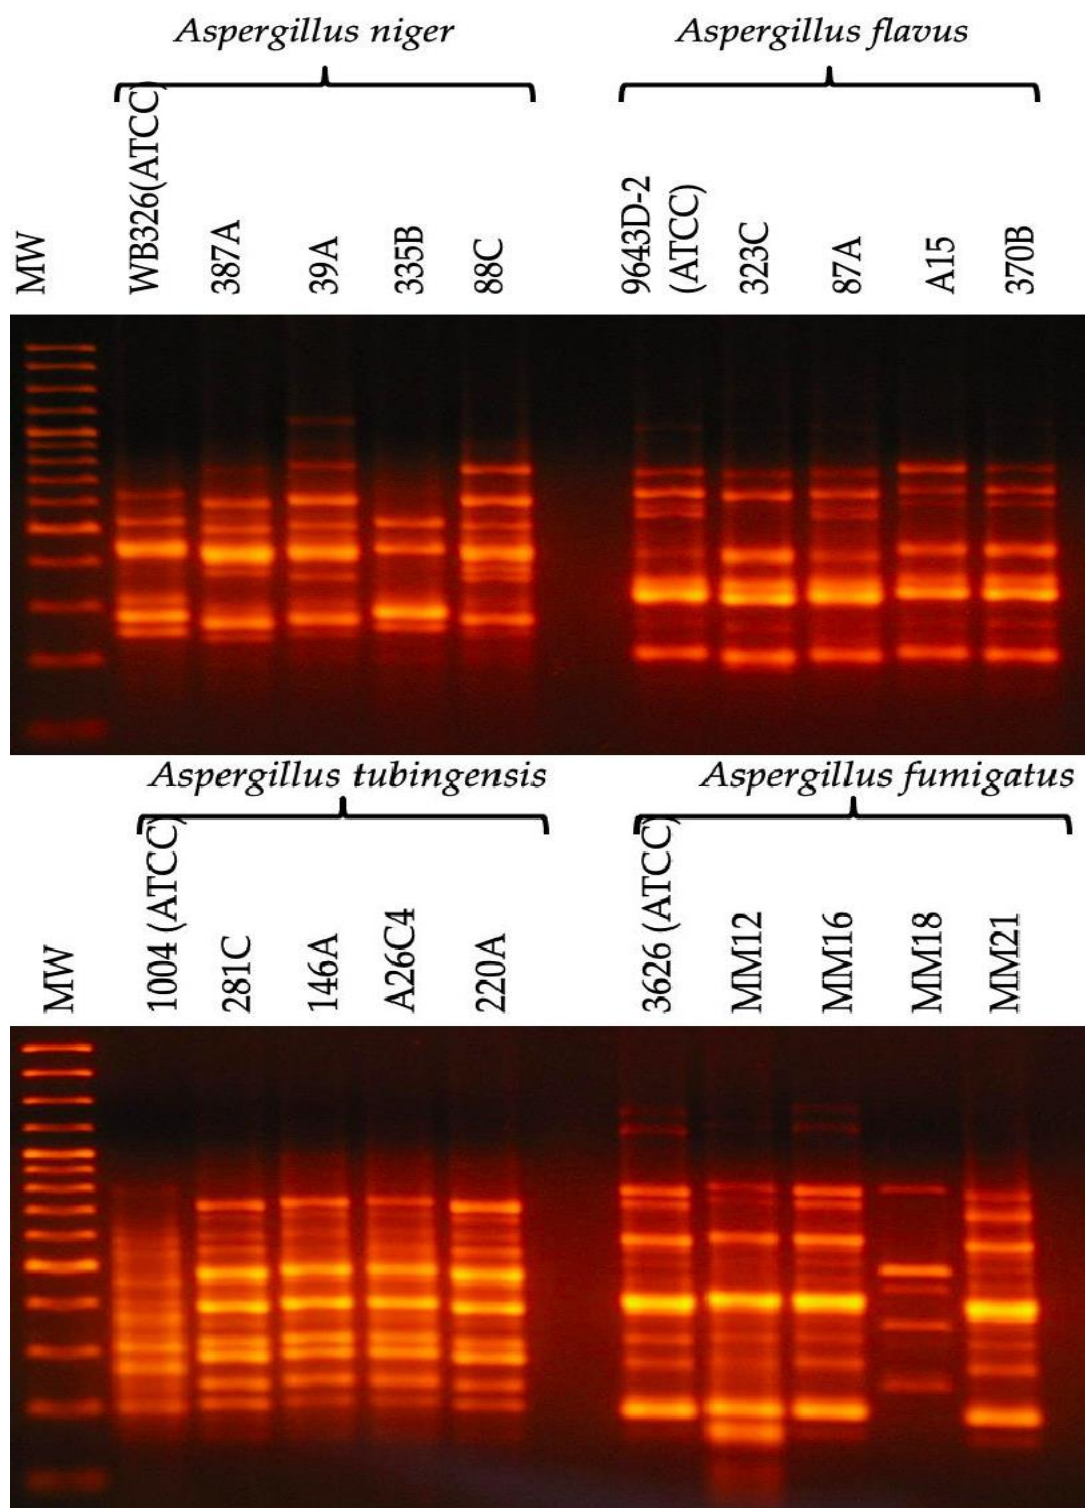

**Figure 41.** Polymorphic patterns obtained by RAPD-PCR for the four species with oligonucleotide T3B.

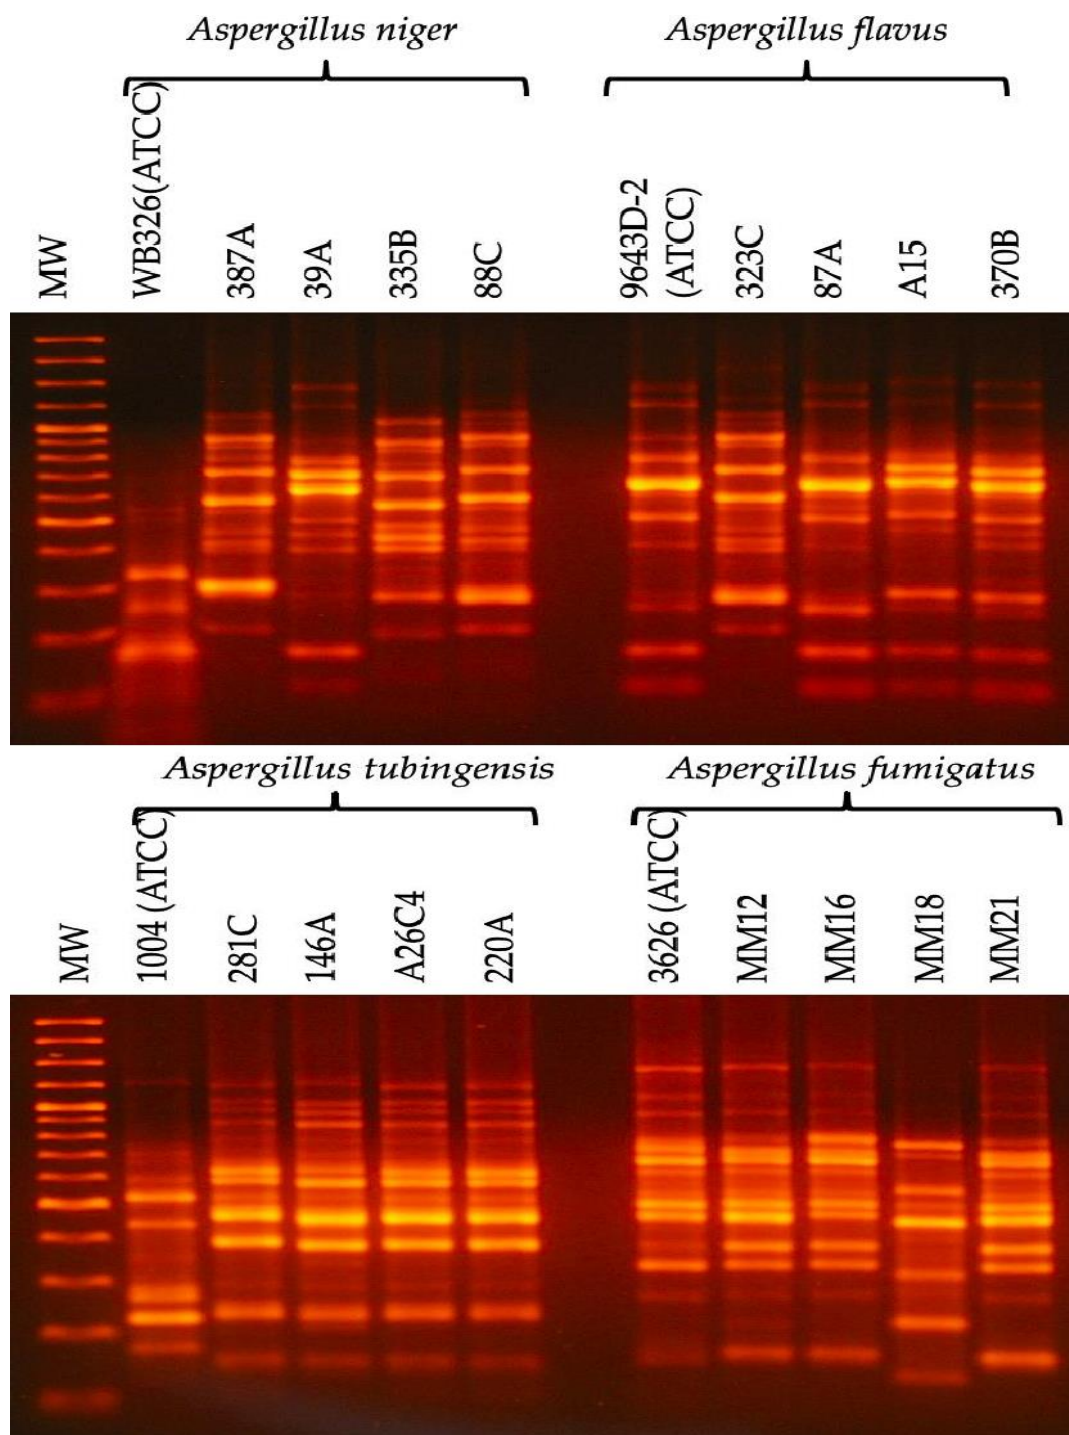

**Figure 42.** Polymorphic patterns obtained by RAPD-PCR for the four species with oligonucleotide OPA-02.

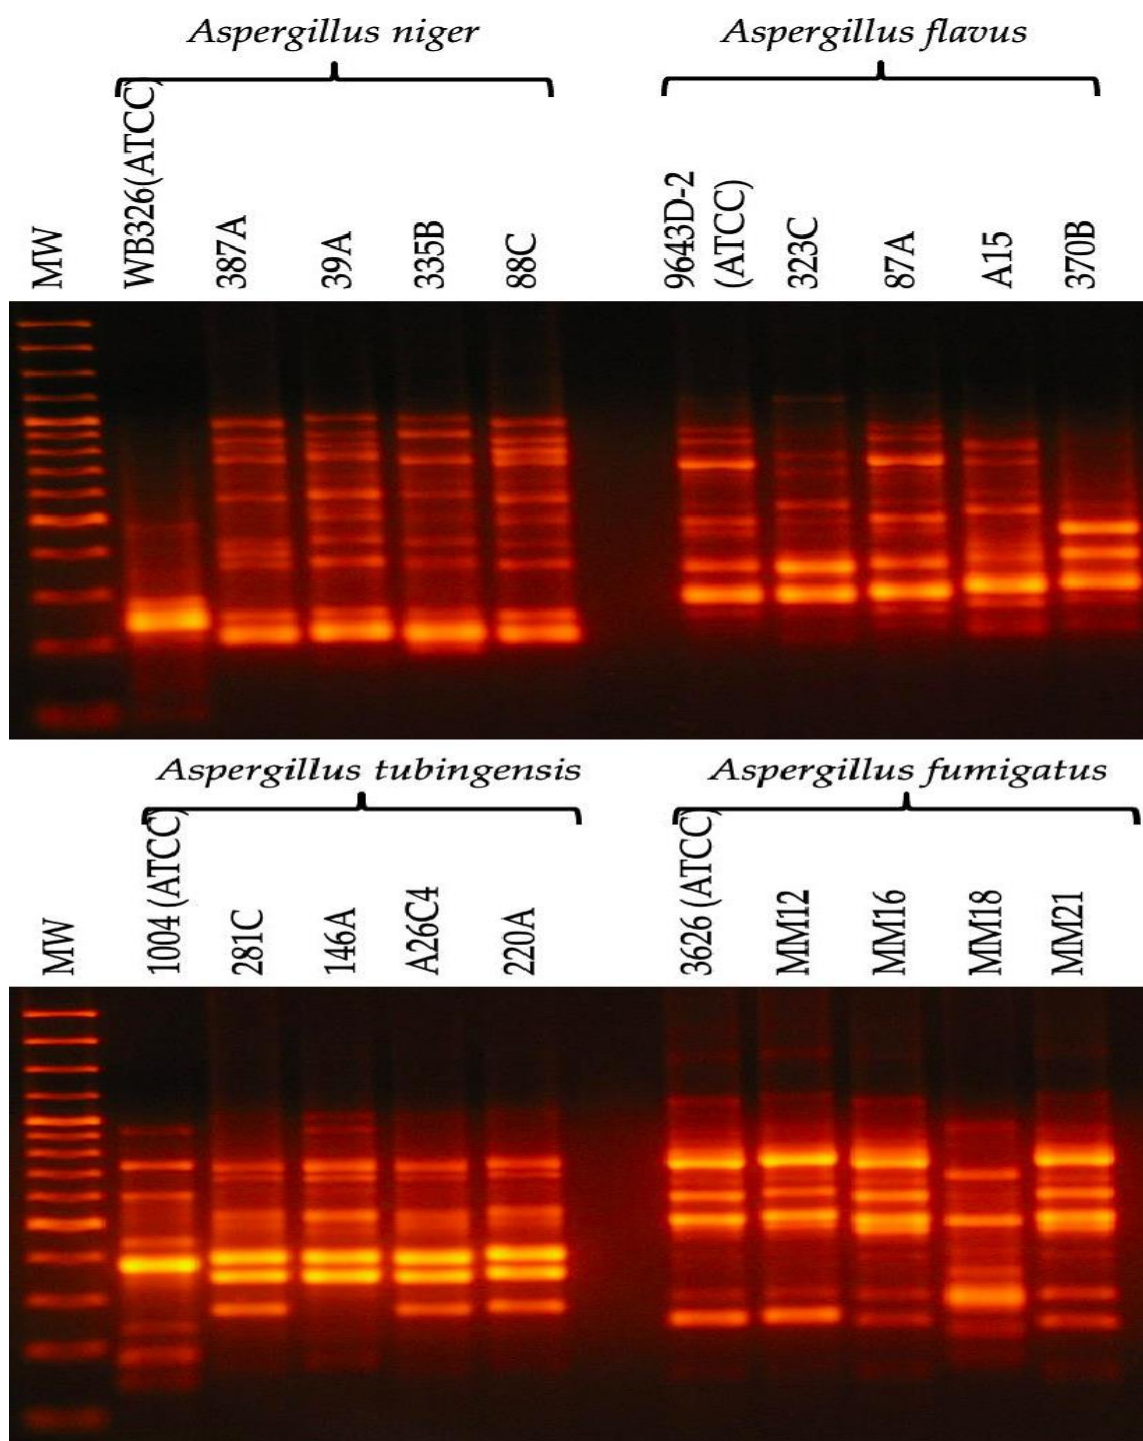

**Figure 43.** Polymorphic patterns obtained by RAPD-PCR for the four species with oligonucleotide OPA-03.
