# Supplementary material for: Selection of Polymorphic Patterns Obtained by RAPD-PCR through Qualitative and Quantitative Analyses to Differentiate Aspergillus fumigatus
Source: J Fungi (Basel). 2022 Mar 13;8(3):296. doi: 10.3390/jof8030296 (PMC8949193; doi:10.3390/jof8030296)
Supplement: Supplementary file 1 [file jof-08-00296-s001.zip]

Archive with 4 entries (4 files):
- Supplementary  Table S1.pdf
- Supplementary Figure S1.pdf
- Supplementary Figure S2.pdf
- Supplementary Figure S3.pdf
